# Supplementary material for: Photomechanical responses of coordination polymers regulated by precise organization of the photoactive centers
Source: Royal Society of Chemistry journal article supplement (doi:10.1039/d4cc03471f), 2024-01-01
Supplement: d4cc03471f1.pdf [file d4cc03471f1.pdf]

## Electronic Supplementary Information

# Photomechanical Responses of Coordination Polymers Regulated by Precise Organization of the Photoactive Centers

Jia-Wei Wu, ‡<sup>a</sup> Zhen Qin, ‡<sup>a</sup> Qing-Shu Dong, ‡<sup>a</sup> David James Young,<sup>b</sup> Fei-Long Hu,<sup>\*a</sup> Yan Mi<sup>\*a</sup>

<sup>a</sup> Key Laboratory of Chemistry and Engineering of Forest Products, State Ethnic Affairs Commission, Guangxi Key Laboratory of Chemistry and Engineering of Forest Products, Guangxi Collaborative Innovation Center for Chemistry and Engineering of Forest Products, Guangxi University for Nationalities, Nanning 530006, China.

<sup>b</sup> Glasgow College UESTC, University of Electronic Science and Technology of China, Chengdu 611731, China.

Video SV1: photosalient effects of CP<sub>1</sub>

Video SV2: photosalient effects of CP<sub>2</sub>

Video SV3: photosalient effects of CP<sub>3</sub>

Video SV4: photosalient effects of CP<sub>3</sub> showing bending behavior

Video SV5: photosalient effects of CP<sub>1</sub>-CP<sub>3</sub>

Video SV6: photosalient effects of CP<sub>3</sub>-PVA membrane

Video SV7: photosalient effects of CP<sub>3</sub>-PVA membrane

Video SV8: photosalient effects of the robot

## Table of Contents

|                                                                                                                                     |           |
|-------------------------------------------------------------------------------------------------------------------------------------|-----------|
| <b>General procedures.....</b>                                                                                                      | <b>3</b>  |
| <b>Experimental.....</b>                                                                                                            | <b>3</b>  |
| <b>Photo-irradiation experiments.....</b>                                                                                           | <b>8</b>  |
| <b>Table. S1 Summary of crystal data and structure refinement parameters for CP<sub>1</sub>-CP<sub>3</sub> and CP<sub>3</sub>'.</b> | <b>10</b> |
| <b>.....</b>                                                                                                                        | <b>10</b> |
| <b>Figure. S1 The <sup>1</sup>H (a) and <sup>13</sup>C (b) NMR spectra of compound 1 in CDCl<sub>3</sub>. .....</b>                 | <b>11</b> |
| <b>Figure. S2 The <sup>1</sup>H (a) and <sup>13</sup>C (b) NMR spectra of Fsbpe in CDCl<sub>3</sub>. .....</b>                      | <b>12</b> |
| <b>Figure. S3 The <sup>1</sup>H (a) and <sup>13</sup>C (b) NMR spectra of compound 2 in CDCl<sub>3</sub>. .....</b>                 | <b>13</b> |
| <b>Figure. S4 The <sup>1</sup>H (a) and <sup>13</sup>C (b) NMR spectra of Fepbe in CDCl<sub>3</sub>.....</b>                        | <b>14</b> |
| <b>Figure. S5 The <sup>1</sup>H (a) and <sup>13</sup>C (b) NMR spectra of compound 3 in CDCl<sub>3</sub>. .....</b>                 | <b>15</b> |
| <b>Figure. S6 The <sup>1</sup>H (a) and <sup>13</sup>C (b) NMR spectra of Fsbpeb in CDCl<sub>3</sub>.....</b>                       | <b>16</b> |

|                                                                                                                                    |    |
|------------------------------------------------------------------------------------------------------------------------------------|----|
| Figure. S7 PXRD patterns of CP <sub>1</sub> (a), CP <sub>2</sub> (b) and CP <sub>3</sub> (c). .....                                | 18 |
| Figure. S8 Thermogravimetric plots of CP <sub>1</sub> (a), CP <sub>2</sub> (b) and CP <sub>3</sub> (c).....                        | 19 |
| Figure. S9 View of the coordination environments of Cd (II) centers in CP <sub>1</sub> . .....                                     | 20 |
| Figure. S10 1D chain like motif in CP <sub>1</sub> .....                                                                           | 20 |
| Figure. S11 The detailed structure of CP <sub>1</sub> showing the C=C distance of 4.251Å.....                                      | 21 |
| Figure. S12 The <sup>1</sup> H NMR spectra of CP <sub>1</sub> (a) and CP <sub>1</sub> ' (b) in DMSO- <i>d</i> <sub>6</sub> . ..... | 22 |
| Figure. S13 Photographs of CP <sub>1</sub> -CP <sub>3</sub> before and after UV light irradiation.....                             | 22 |
| Figure. S14 PS behavior of CP <sub>1</sub> .....                                                                                   | 23 |
| Figure. S15 1D chain motif of CP <sub>2</sub> . .....                                                                              | 23 |
| Figure. S16 The <sup>1</sup> H NMR spectra of CP <sub>2</sub> before and after UV light irradiation. ....                          | 24 |
| Figure. S17 PS behavior of CP <sub>2</sub> .....                                                                                   | 25 |
| Figure. S18 1D chain like motif of CP <sub>3</sub> .....                                                                           | 25 |
| Figure. S19 The <sup>1</sup> H NMR spectra of CP <sub>3</sub> before and after UV light irradiation. ....                          | 26 |
| Figure. S20 The tip displacement angle for CP <sub>3</sub> upon UV light irradiation.....                                          | 27 |
| Figure. S21 CP <sub>3</sub> showed reversible bending behavior against UV light irradiation.....                                   | 27 |
| Figure. S22 Calculated growth morphology of CP <sub>3</sub> from single crystal data (Mercury) <sup>S3</sup> .....                 | 28 |
| Figure. S23 The <sup>1</sup> H NMR spectra of CP <sub>3</sub> treated by UV light and heating.....                                 | 28 |
| Figure. S24 The PS behaviors of CP <sub>1</sub> -CP <sub>3</sub> under UV light irradiation.....                                   | 29 |
| Figure. S25 IR spectra of CP <sub>3</sub> , PVA and CP <sub>3</sub> -PVA membrane.....                                             | 29 |
| Figure. S26 PXRD profile of CP <sub>3</sub> -PVA membrane.....                                                                     | 30 |
| References .....                                                                                                                   | 30 |

## General procedures

The ligands 4-(3-(4-fluorostyryl)-5-(pyridin-4-yl)phenyl)pyridine (Fsbpe), 4,4'-(5-((4-fluorophenyl)ethynyl)-1,3-phenylene)dipyridine (Fepbpe) and 4-(3-(4-fluorostyryl)-5-((E)-2-(pyridin-4-yl)vinyl)styryl)pyridine (Fsbpeb) were prepared according to literature methods.<sup>S1</sup> Other reagents were obtained commercially and used without further purification. Powder X-ray diffraction (PXRD) patterns were acquired on a Bruker D8 advance using Cu K $\alpha$  radiation ( $\lambda = 1.5406 \text{ \AA}$ ) from  $5^\circ$  to  $50^\circ$  with a scanning step size of  $0.02^\circ$ . Single-crystal X-ray diffraction data for CP<sub>1</sub>, CP<sub>2</sub>, CP<sub>3</sub> and CP<sub>3</sub>' were recorded on a Bruker Smart CCD diffractometer. <sup>1</sup>H NMR chemical shifts were referenced to the solvent signal in CDCl<sub>3</sub> or DMSO-*d*<sub>6</sub>. <sup>13</sup>C-NMR spectra were recorded at a resonance frequency of 101.6 MHz on a Bruker AVANCE 400M spectrometer. IR spectra were recorded on a Varian 1000 FT-IR spectrometer (4000-400 cm<sup>-1</sup>). Elemental analyses (C, H, N) were performed using a PE 2400 II elemental analyzer. Thermogravimetric analyses (TGA) were performed on a Mettler Toledo Star System under a nitrogen atmosphere at a heating rate of 10 °C/min. Photo-irradiation experiments were conducted with a high-pressure mercury lamp at a wavelength of 365 nm.

## Experimental

**Synthesis of ligand Fsbpe.** A 50 mL round-bottom flask was charged with 1-(bromomethyl)-4-fluorobenzene (1.89 g, 10 mmol) and trimethyl phosphite (2.15 mL). The mixture was heated at 120 °C for a period of 8 h and then cooled to room temperature. A solution of 3,5-dibromo-4-methylbenzaldehyde (2.64 g, 11 mmol) in dry tetrahydrofuran was added under ice-water bath conditions, followed by dropwise addition of a solution of potassium tert-butoxide (2 g, 21 mmol) in tetrahydrofuran. The reaction was kept in an ice-water bath for 14 h and then diluted with H<sub>2</sub>O (200 mL). The mixture was extracted with CH<sub>2</sub>Cl<sub>2</sub> (3 × 50 mL). The organic phase was collected

and concentrated to give the crude compound **1**. Yield: 1.99 g (56 %). <sup>1</sup>H NMR (400 MHz, DMSO-*d*<sub>6</sub>, TMS, Figure. S1): δ 7.55 (s, 2H, Ph-H), 7.53 (d, 1H, Ph-H), 7.48 (m, 2H, F-Ph-H), 7.09 (m, 2H, F-Ph-H), 7.07 and 7.03 (d, 1H, C=C), 6.86 and 6.82 (d, 1H, C=C). <sup>13</sup>C NMR (100 MHz, CDCl<sub>3</sub>, ppm): δ 163.00, 160.52, 139.81, 131.65, 129.29, 126.99, 124.39, 122.21, 114.90, 114.71 (Figure S1).

A 50 mL round-bottom flask was charged with **1** (1.78 g, 5 mmol), pyridine-4-boronic acid (1.84 g, 15 mmol), Pd(PPh<sub>3</sub>)<sub>2</sub>Cl<sub>2</sub> (0.14 g, 0.2 mmol) and a solution of anhydrous caesium carbonate (1.36 g, 10 mmol) in 20 mL of 1,4-dioxane and H<sub>2</sub>O (v:v=1:1). The mixture was heated at 120 °C for a period of 48 h and then diluted with H<sub>2</sub>O (200 mL). The mixture was extracted with CH<sub>2</sub>Cl<sub>2</sub> (3 × 50 mL). The organic phase was collected and concentrated to give the crude product. Purification of the residue by flash chromatography (hexanes/EtOAc = 1:1 to 1:2) afforded Fsbpe as a pale yellow powder, Yield: 1.05 g (60 %). <sup>1</sup>H NMR (400 MHz, DMSO-*d*<sub>6</sub>, TMS, Figure. S2): δ 8.73 (m, 4H, Py-H), 7.80 (d, 2H, Ph-H), 7.73 (s, 1H, Ph-H), 7.60 (m, 4H, Py-H), 7.55 (m, 2H, Ph-H), 7.25 and 7.21 (d, 1H, C=C), 7.16 and 7.12 (d, 1H, C=C), 7.11 (t, 2H, Ph-H). <sup>13</sup>C NMR (100 MHz, CDCl<sub>3</sub>, ppm): δ 149.40, 146.72, 138.73, 138.04, 128.37, 127.19, 126.12, 124.51, 123.86, 120.75 (Figure S2).

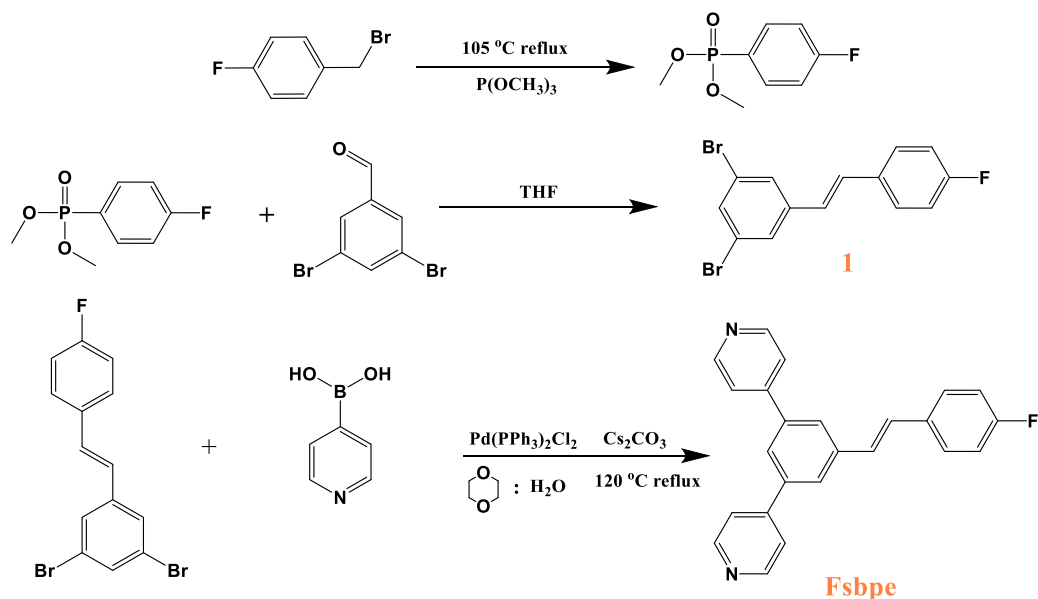

Scheme S1. Synthesis of Fsbpe.

**Synthesis of ligand Fepbpe.** A 50 mL round-bottom flask was charged with 1,3,5-tribromobenzene (2.00 g, 6.4 mmol), pyridine-4-boronic acid hydrochloride (2.90 g, 12.8 mmol), Pd(PPh<sub>3</sub>)<sub>2</sub>Cl<sub>2</sub> (0.25 g, 0.35 mmol) and anhydrous caesium carbonate (4.17 g, 12.8 mmol) in 20 mL of 1,4-dioxane and H<sub>2</sub>O (v:v=1:1). The mixture was heated at 120 °C for a period of 48 h and then diluted with H<sub>2</sub>O (200 mL). The mixture was extracted with CH<sub>2</sub>Cl<sub>2</sub> (3 × 50 mL). The organic phase was collected and concentrated to give the crude product of **2**, which was then recrystallized from MeOH and collected as a yellow powder. Yield: 1.83 g (92 %). <sup>1</sup>H NMR (400 MHz, DMSO-*d*<sub>6</sub>, TMS): δ 8.72-8.73 (m, 4H, Py-H), 7.83-7.84 (d, 4H, C=C), 7.77 (s, 1H, Ph-H), 7.52-7.53 (m, 2H, Py-H). <sup>13</sup>C NMR (100 MHz, CDCl<sub>3</sub>, ppm): δ 149.47, 145.47, 140.6, 129.49, 123.49, 122.99, 122.65 (Figure S3).

A 50 mL round-bottom flask was charged with **2** (2.00 g, 6.4 mmol), 4-fluorophenylacetylene (1.10 g, 9.12 mmol), Pd(PPh<sub>3</sub>)<sub>4</sub> (0.11 g, 0.095 mmol) and cuprous iodide (0.28 g, 1.5 mmol) in 20 mL of THF and Et<sub>3</sub>N (v:v=1:1). The mixture was heated at 80 °C for a period of 24 h and then diluted with H<sub>2</sub>O (200 mL). The mixture was extracted with CH<sub>2</sub>Cl<sub>2</sub> (3 × 50 mL) and the organic layers combined, dried with anhydrous Na<sub>2</sub>SO<sub>4</sub> and evaporated *in vacuo*. The crude product was purified by silica gel column chromatography (hexanes/EtOAc = 1:1 to 1:2) to give a yellow powder of Fepbpe. Yield: 2.06 g (92 %). <sup>1</sup>H NMR (400 MHz, DMSO-*d*<sub>6</sub>, TMS, Figure S3): δ 8.48(m, 4H, Py-H), 7.58 (m, 3H, Py-H), 7.28-7.29 (d, 6H, Py-H and Ph-H), 6.80-6.82 (d, 2H, Ph-H). <sup>13</sup>C NMR (100 MHz, CDCl<sub>3</sub>, ppm): δ 163.03, 160.54, 149.41, 146.05, 138.54, 132.68, 129.45, 124.49, 124.12, 114.95, 114.73, 88.86, 86.83 (Figure S4).

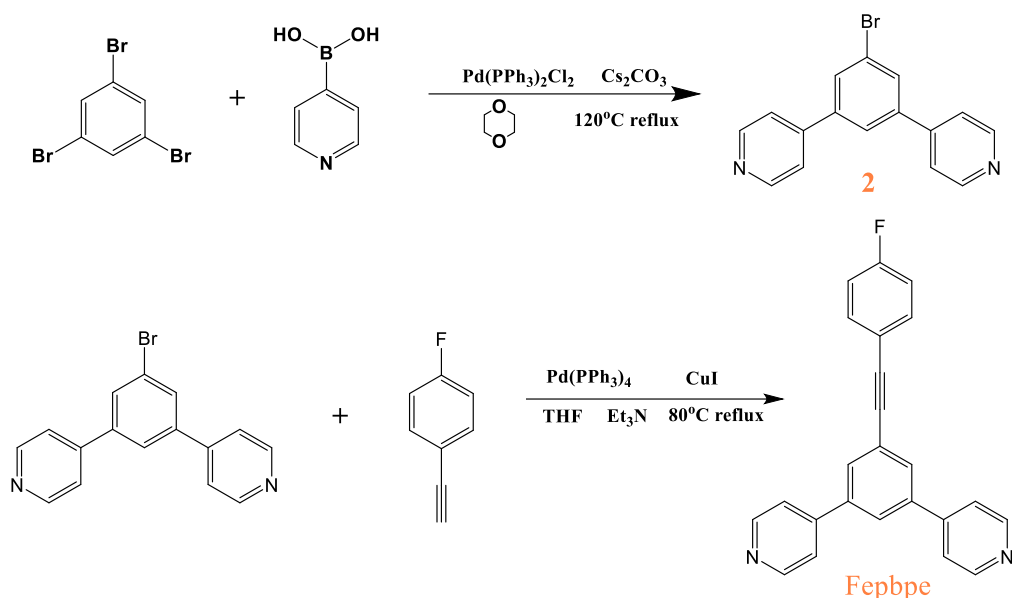

Scheme S2. The synthesis of Fepbpe.

**Synthesis of ligand Fsbpeb.** A 50 mL round-bottom flask was charged with 5-bromobenzene-1,3-dialdehyde (1.00 g, 4.7 mmol) and 4-methylpyridine (0.93 g, 10 mmol), in 2 mL of acetic anhydride. The mixture was heated at 130 °C for a period of 24 h and then diluted with H<sub>2</sub>O (200 mL) to form compound **3**, yield: 0.85 g (50 %). <sup>1</sup>H NMR (400 MHz, DMSO-*d*<sub>6</sub>, TMS): δ 8.60 (m, 4H, Py-H), 7.61(d, 2H, Ph-H), 7.54 (s, 1H, Ph-H), 7.36 (m, 4H, Py-H), 7.23 and 7.19 (d, 4H, C=C), 7.05 and 7.01 (d, 4H, C=C). <sup>13</sup>C NMR (100 MHz, CDCl<sub>3</sub>, ppm): δ 149.30, 142.83, 137.60, 130.09, 128.47, 127.03, 123.52, 122.48, 119.93 (Figure S5).

A 50 mL round-bottom flask was charged with 4-Fluorostyrene (2.68 g, 22 mmol), compound **3** (2.61 g, 7.2 mmol), Pd(PPh<sub>3</sub>)<sub>2</sub>Cl<sub>2</sub> (0.14 g, 0.2 mmol) and anhydrous potassium carbonate (2.07 g, 15 mmol) in 20 mL of DMF. The mixture was heated at 105 °C for a period of 2 h and then diluted with H<sub>2</sub>O (200 mL). The mixture was extracted with CH<sub>2</sub>Cl<sub>2</sub> (3 × 50 mL). The combined organic phases were washed with brine, dried over anhydrous Na<sub>2</sub>SO<sub>4</sub> and concentrated at reduced pressure. Purification of the residue by flash chromatography (hexanes/EtOAc = 1:1 to 1:2) afforded Fsbpeb as a pale yellow powder. Yield: 1.63 g (56 %). <sup>1</sup>H NMR (400 MHz, DMSO-*d*<sub>6</sub>, TMS, Figure. S1): δ 8.62 (m, 4H, Py-H), 7.64 (s, 2H, Ph-H), 7.60 (s, 1H, Ph-H), 7.57 and 7.55

(d, 2H, Ph-H), 7.42 (m, 4H, Py-H), 7.38 (d, 2H, Ph-H), 7.37 and 7.33 (d, 4H, C=C), 7.21 (s, 1H, C=C), 7.17 (s, 1H, C=C), 7.14 and 7.10 (d, 2H, C=C).  $^{13}\text{C}$  NMR (100 MHz,  $\text{CDCl}_3$ , ppm):  $\delta$  149.22, 143.38, 137.50, 136.11, 135.87, 131.57, 129.05, 127.80, 125.95, 125.63, 124.28, 123.65, 119.92 (Figure S6).

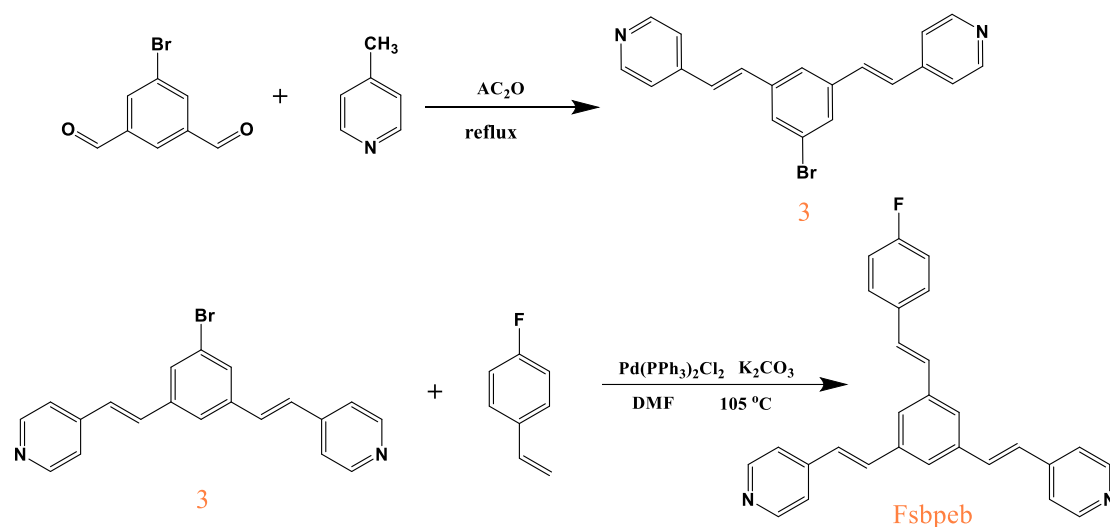

Scheme S3. The synthesis of Fsbpeb.

**Preparation of  $[\text{Cd}(\text{Fsbpe})(\text{DBBA})_2]\cdot 2\text{DMF}$  ( $\text{CP}_1$ ).** A mixture containing 3,5-Dibromobenzoic acid (**DBBA**) (14.0 mg, 0.05 mmol), Fsbpe (17.6 mg, 0.05 mmol) and  $\text{CdSO}_4\cdot 8/3\text{H}_2\text{O}$  (250 mg, 0.05 mmol) in  $\text{DMF-H}_2\text{O-MeCN-HNO}_3$  (2 mL, 3:25:1:2 in volume ratio) was sealed in a Pyrex tube and heated at  $140\text{ }^\circ\text{C}$  for 10 h to yield pale yellowish block crystals of  $\text{CP}_1$  (38.0 mg, 65%, based on Fsbpe). Anal. Calcd for  $\text{C}_{44}\text{H}_{37}\text{N}_4\text{O}_6\text{CdFBr}_4$ : C, 45.21; H, 3.19; N, 4.79. found: C, 44.64; H, 3.07; N, 4.76.  $^1\text{H}$  NMR (400 MHz,  $\text{DMSO-}d_6$ , ppm):  $\delta$  8.72 and 7.94(m, 8H, Py-H), 8.13 (d, 2H, Ph-H), 8.09 (s, 1H, Ph-H), 8.04 (d, 2H, Ph-H of  $\text{HL}_1$ ), 7.99 (s, 1H, Ph-H of  $\text{HL}_1$ ), 7.72 (m, 2H, F-Ph-H), 7.63 and 7.59 (d, 1H, CH=CH), 7.41 and 7.37 (d, 1H, CH=CH), 7.29 (t, 2H, F-Ph-H). IR (KBr disk,  $\text{cm}^{-1}$ ): 3075(w), 1611(s), 1595(s), 1541(s), 1506(s), 1435(s), 1379(s), 1069 (w), 1019(m), 958(m), 822(m), 787(s), 739(s), 727(s), 628(s).

**Preparation of  $[\text{Cd}(\text{Fepbpe})(\text{DBBA})_2]\cdot 2\text{DMF}$  ( $\text{CP}_2$ ).** A mixture containing DBBA (14.0 mg, 0.05 mmol), Fepbpe (17.5 mg, 0.05 mmol) and  $\text{CdSO}_4\cdot 8/3\text{H}_2\text{O}$  (250 mg, 0.05



mmol) in DMF-H<sub>2</sub>O-CH<sub>3</sub>CN-HNO<sub>3</sub> (2 mL, 4:25:3:2 in volume ratio) was sealed in a Pyrex tube and heated at 140 °C for 10 h to yield yellowish-brown block crystals of **CP<sub>2</sub>** (43.6 mg, 75 % based on Fepbpe). Anal. Calcd for C<sub>44</sub>H<sub>34</sub>N<sub>4</sub>O<sub>6</sub>CdFBr<sub>4</sub>: C, 44.33; H, 2.94; N, 4.81. found: C, 44.23; H, 2.90; N, 4.77. <sup>1</sup>H NMR (400 MHz, DMSO-*d*<sub>6</sub>, ppm): δ 8.71 and 7.94 (m, 8H, Py-H), 8.23 (s, 1H, Ph-H), 8.02 (d, 2H, Ph-H of HL), 8.10 (s, 2H, Ph-H), 7.98 (s, 2H, Ph-H of HL), 7.70 (m, 2H, F-Ph-H), 7.35 (t, 2H, F-Ph-H). IR (KBr disk, cm<sup>-1</sup>): 3074(w), 1716(s), 1612(s), 1541(s), 1506(s), 1434(s), 1411(s), 1378(s), 1223(s), 1153(w), 1070(s), 1019(m), 871(m), 830(s), 821(s), 781(s), 740(s), 717(s), 630(s).

**Preparation of [Cd(Fsbpeb)(DBBA)<sub>2</sub>] (CP<sub>3</sub>).** A mixture containing DBBA (14.0 mg, 0.05 mmol), CdSO<sub>4</sub>·8/3H<sub>2</sub>O (250 mg, 0.05 mmol) and Fsbpeb (20.2 mg, 0.05 mmol) in DMF-H<sub>2</sub>O-HNO<sub>3</sub> (2 mL, 3:5:2 in volume ratio) was sealed in a Pyrex tube and heated at 140 °C for 10 h to yield yellow leaf-shaped crystals of **CP<sub>3</sub>** (42.9mg, 80 %, based on Fsbpeb). Anal. Calcd for C<sub>42</sub>H<sub>27</sub>N<sub>2</sub>O<sub>4</sub>CdFBr<sub>4</sub>: C, 46.94; H, 2.53; N, 2.61. found: C, 46.90; H, 2.51; N, 2.59. <sup>1</sup>H NMR (400 MHz, DMSO-*d*<sub>6</sub>, ppm, Fig. S9b): δ 8.60 and 7.61 (m, 8H, Py-H), 8.03 (d, 2H, Ph-H of HL<sub>1</sub>), 7.95 (m, 1H, Ph-H of HL<sub>1</sub>), 7.87 (d, 3H, Ph-H), 7.71 (m, 2H, F-Ph-H), 7.63 and 7.59 (d, 2H, CH=CH), 7.43 and 7.39 (d, 2H, CH=CH), 7.41 (s, 1H, CH=CH), 7.30 (s, 1H, CH=CH), 7.28 (t, 2H, F-Ph-H). IR (KBr disk, cm<sup>-1</sup>): 3071(w), 1606(s), 1589(s), 1544(s), 1507(s), 1430(s), 1374(s), 1224(s), 1156(m), 1014(m), 977(m), 961(s), 867(m), 845(s), 785(s), 739(s), 726(s).

### Photo-irradiation experiments

Crystals (*ca.* 0.5 g) of **CP<sub>1</sub>**, **CP<sub>2</sub>** and **CP<sub>3</sub>** were placed between glass plates and exposed to a 100W high-pressure mercury lamp ( $\lambda = 365$  nm) for 13h to form the corresponding photoproducts **CP<sub>1</sub>'**, **CP<sub>2</sub>'** and **CP<sub>3</sub>'**, respectively.

**Single crystal structure determination.** Structures of **CP<sub>1</sub>-CP<sub>3</sub>** and **CP<sub>3</sub>'** were solved by direct methods and refined by full-matrix least-squares techniques using the *SHELXL*-2019, Olex 2 programs.<sup>S2</sup> Non-hydrogen atoms were refined with anisotropic displacement parameters. The H atoms were introduced at the calculated positions and included in the structure-factor calculations. The crystal of CP<sub>3</sub>' was cracked after ultraviolet light irradiation, which caused the low diffraction quality and resulted in higher wR<sub>2</sub> value. A summary of key crystallographic information for **CP<sub>1</sub>-CP<sub>3</sub>** and **CP<sub>3</sub>'** is given in Table S1. The CCDC codes for these compounds are 2362977-2362980.

**Table. S1** Summary of crystal data and structure refinement parameters for **CP<sub>1</sub>-CP<sub>3</sub>** and **CP<sub>3</sub>'**.

|                                    | <b>CP<sub>1</sub></b>                                                            | <b>CP<sub>2</sub></b>                                                            | <b>CP<sub>3</sub></b>                                                            | <b>CP<sub>3</sub>'</b>                                                           |
|------------------------------------|----------------------------------------------------------------------------------|----------------------------------------------------------------------------------|----------------------------------------------------------------------------------|----------------------------------------------------------------------------------|
| Empirical formula                  | C <sub>44</sub> H <sub>37</sub> Br <sub>4</sub> CdFN <sub>4</sub> O <sub>6</sub> | C <sub>44</sub> H <sub>34</sub> Br <sub>4</sub> CdFN <sub>4</sub> O <sub>6</sub> | C <sub>42</sub> H <sub>27</sub> Br <sub>4</sub> CdFN <sub>2</sub> O <sub>4</sub> | C <sub>42</sub> H <sub>27</sub> Br <sub>4</sub> CdFN <sub>2</sub> O <sub>4</sub> |
| Formula weight                     | 1168.81                                                                          | 1165.79                                                                          | 1074.69                                                                          | 1074.69                                                                          |
| Crystal system                     | orthorhombic                                                                     | orthorhombic                                                                     | monoclinic                                                                       | monoclinic                                                                       |
| Space group                        | <i>Pbcm</i>                                                                      | <i>Pbcm</i>                                                                      | <i>C2/c</i>                                                                      | <i>C2/c</i>                                                                      |
| a/Å                                | 13.8988(5)                                                                       | 14.0326(3)                                                                       | 32.9042(2)                                                                       | 31.7904(7)                                                                       |
| b/Å                                | 21.9666(6)                                                                       | 22.0287(5)                                                                       | 13.83950(10)                                                                     | 13.9507(3)                                                                       |
| c/Å                                | 27.6464(13)                                                                      | 27.5640(8)                                                                       | 16.81450(10)                                                                     | 17.6164(4)                                                                       |
| α/°                                | 90                                                                               | 90                                                                               | 90                                                                               | 90                                                                               |
| β/°                                | 90                                                                               | 90                                                                               | 94.8430(10)                                                                      | 96.614(2)                                                                        |
| γ/°                                | 90                                                                               | 90                                                                               | 90                                                                               | 90                                                                               |
| V/Å <sup>3</sup>                   | 8440.7(6)                                                                        | 8520.6(4)                                                                        | 7629.61(9)                                                                       | 7760.8(3)                                                                        |
| D <sub>c</sub> /g cm <sup>-3</sup> | 1.840                                                                            | 1.818                                                                            | 1.871                                                                            | 1.840                                                                            |
| Z                                  | 8                                                                                | 8                                                                                | 8                                                                                | 8                                                                                |
| μ (Mo-Kα)/mm <sup>-1</sup>         | 9.070                                                                            | 8.985                                                                            | 9.914                                                                            | 9.747                                                                            |
| Total reflections                  | 23314                                                                            | 22184                                                                            | 30235                                                                            | 26895                                                                            |
| No. observations                   | 8512                                                                             | 8577                                                                             | 7954                                                                             | 7054                                                                             |
| No. parameters                     | 513                                                                              | 484                                                                              | 520                                                                              | 581                                                                              |
| F (000)                            | 4592                                                                             | 4568                                                                             | 4176                                                                             | 4176                                                                             |
| R <sub>1</sub> <sup>a</sup>        | 0.0601                                                                           | 0.0635                                                                           | 0.0516                                                                           | 0.1154                                                                           |
| wR <sub>2</sub> <sup>b</sup>       | 0.1664                                                                           | 0.1902                                                                           | 0.1428                                                                           | 0.3257                                                                           |
| GOF <sup>c</sup>                   | 1.032                                                                            | 1.025                                                                            | 1.056                                                                            | 1.167                                                                            |

<sup>a</sup>R<sub>1</sub> =  $\sum||F_o| - |F_c||/\sum|F_o|$ , <sup>b</sup>wR<sub>2</sub> =  $\{\sum w(F_o^2 - F_c^2)^2/\sum w(F_o^2)^2\}^{1/2}$ , <sup>c</sup>GOF =  $\{\sum w((F_o^2 - F_c^2)^2)/(n - p)\}^{1/2}$ , where *n* = number of reflections and *p* = total number of parameters refined.

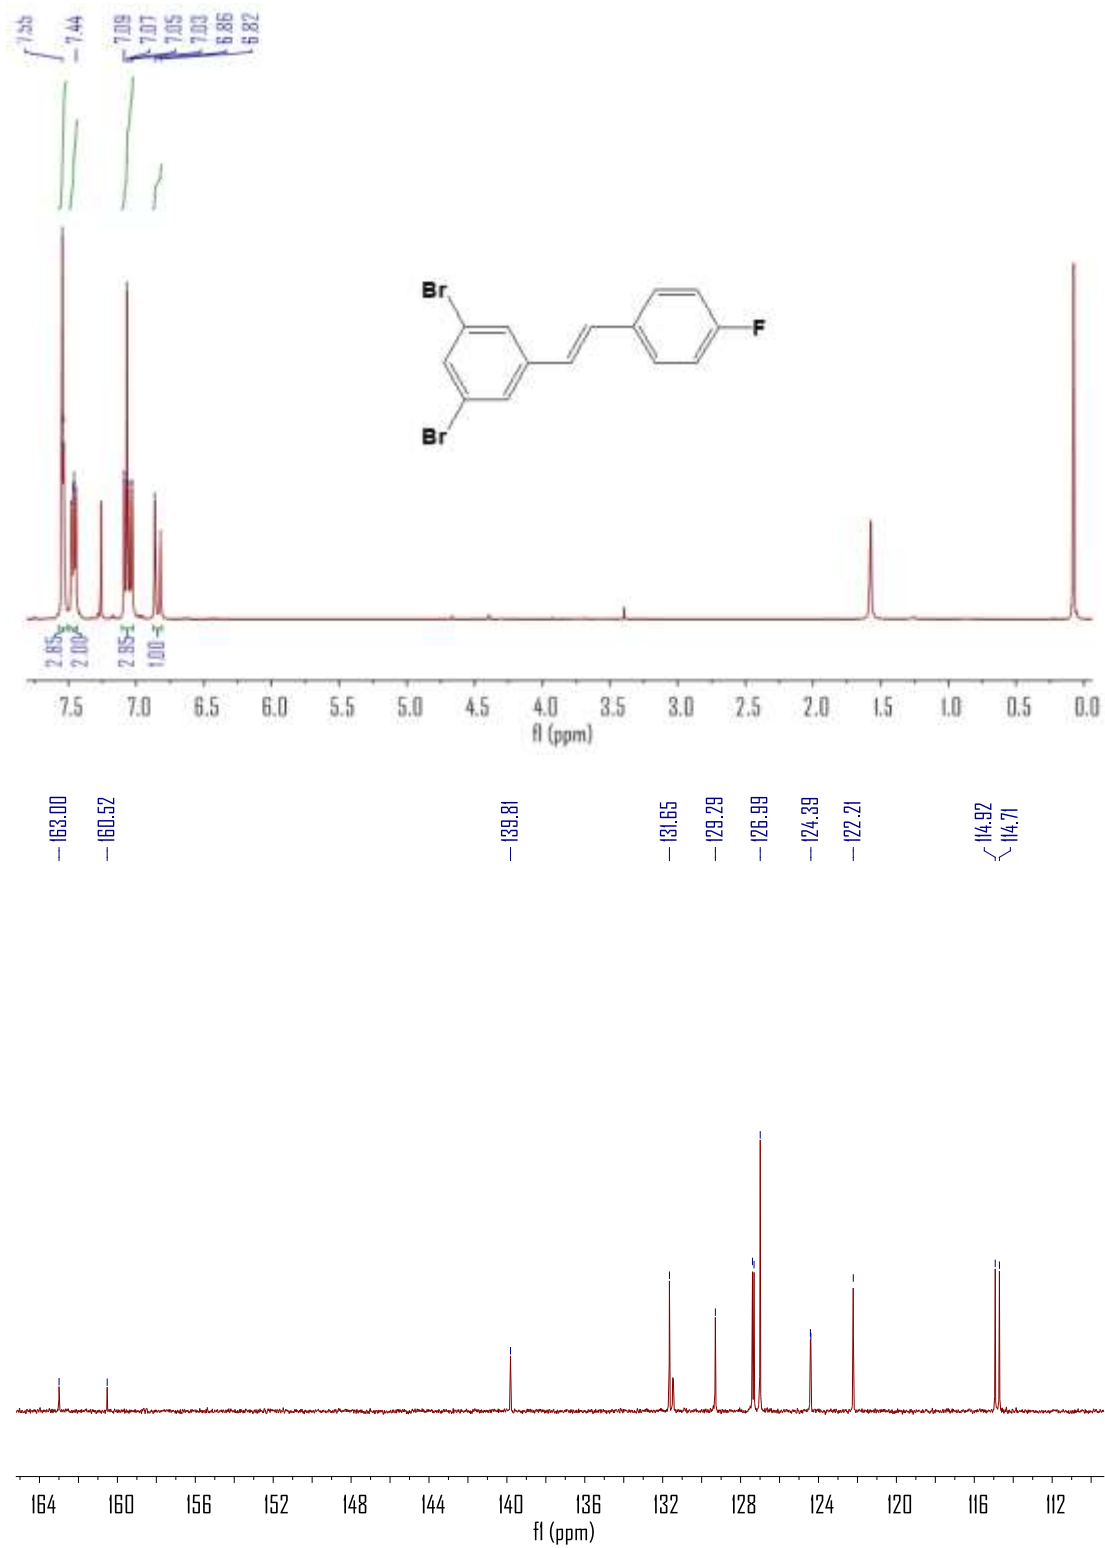

**Figure. S1** The <sup>1</sup>H (a) and <sup>13</sup>C (b) NMR spectra of **compound 1** in CDCl<sub>3</sub>.

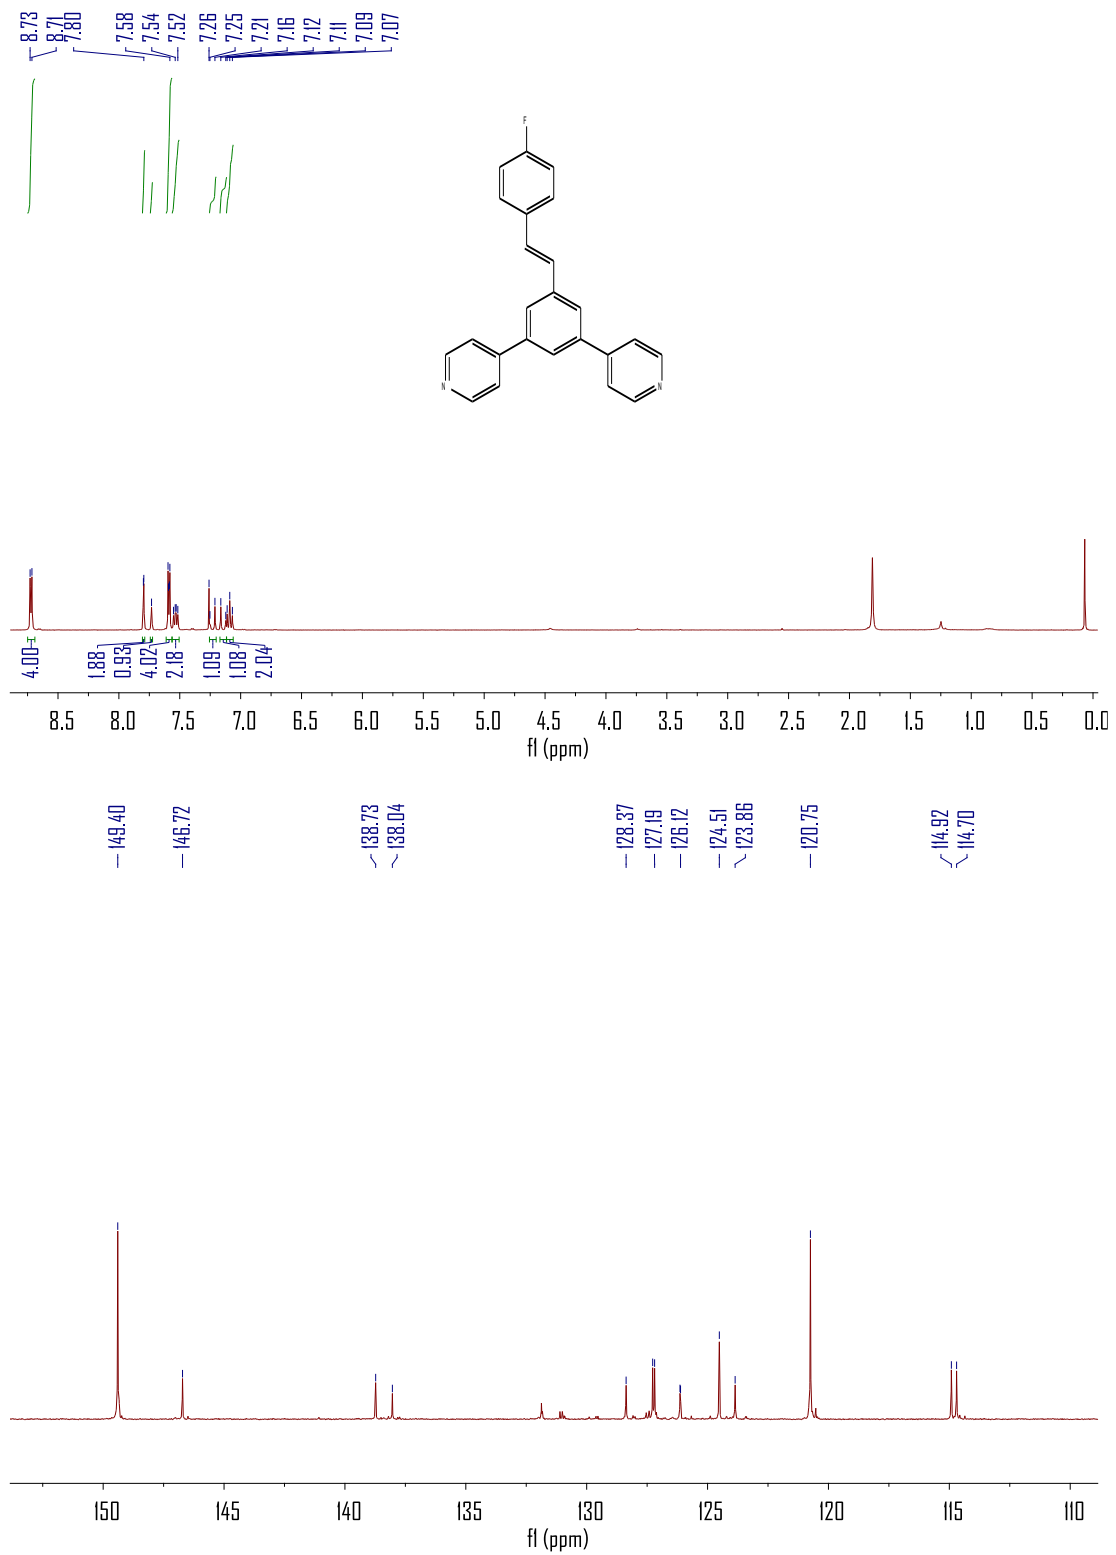

**Figure. S2** The  $^1\text{H}$  (a) and  $^{13}\text{C}$  (b) NMR spectra of **Fsbpe** in  $\text{CDCl}_3$ .

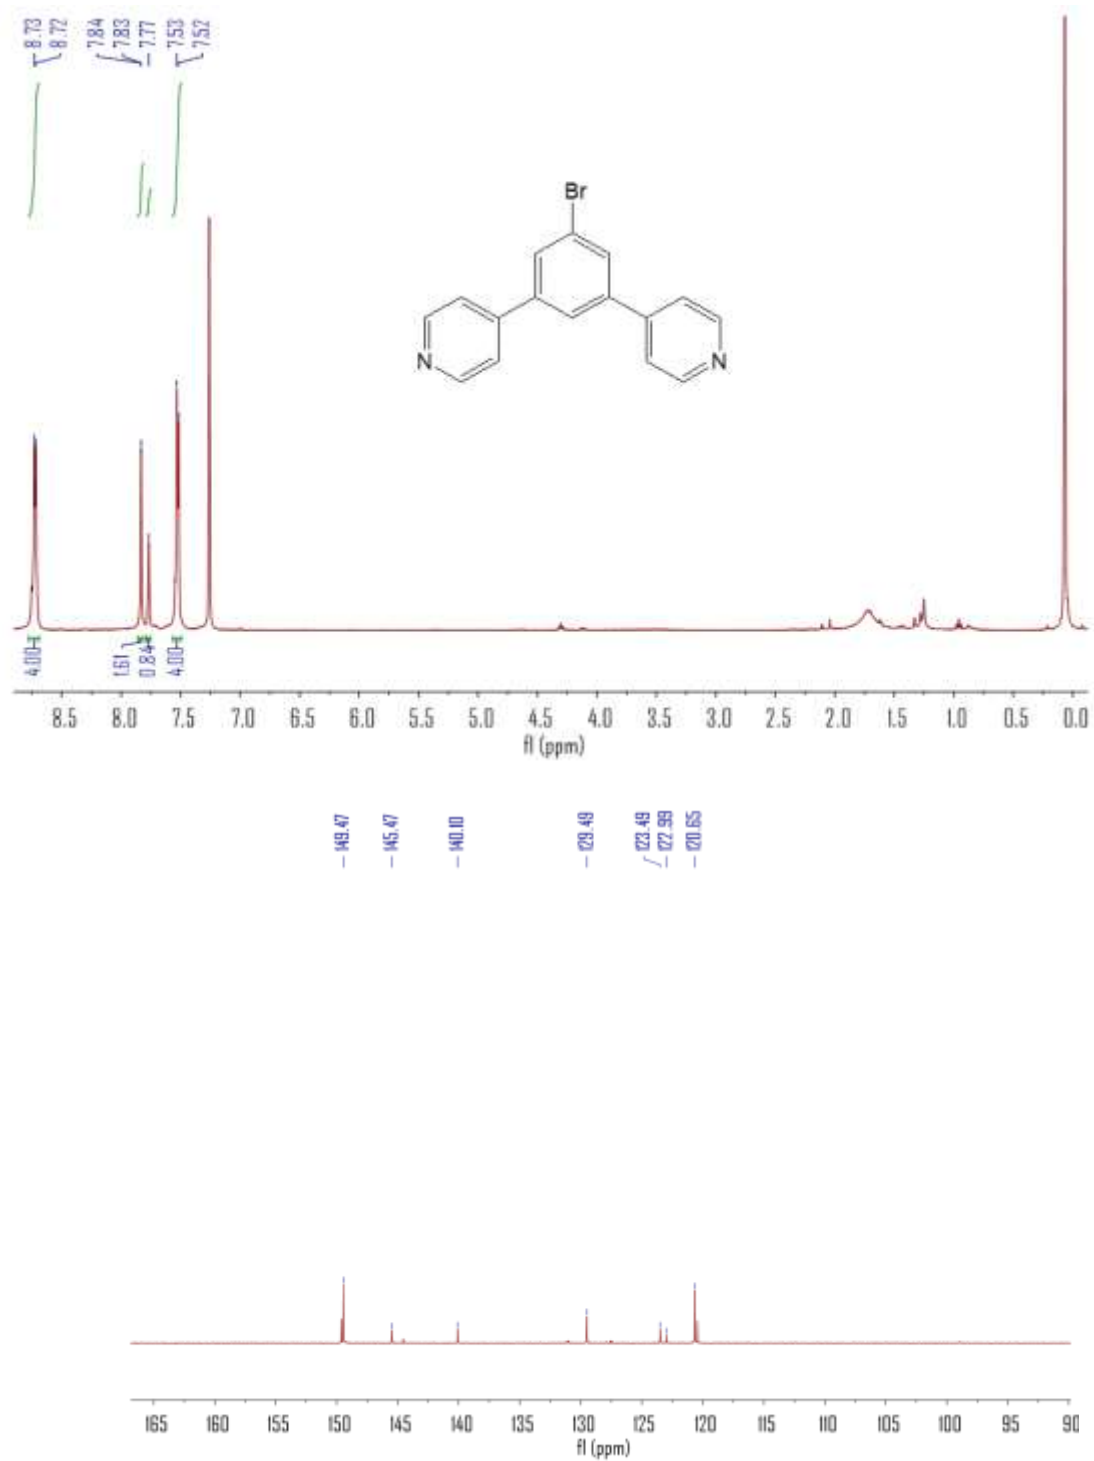

**Figure. S3** The <sup>1</sup>H (a) and <sup>13</sup>C (b) NMR spectra of compound 2 in CDCl<sub>3</sub>.

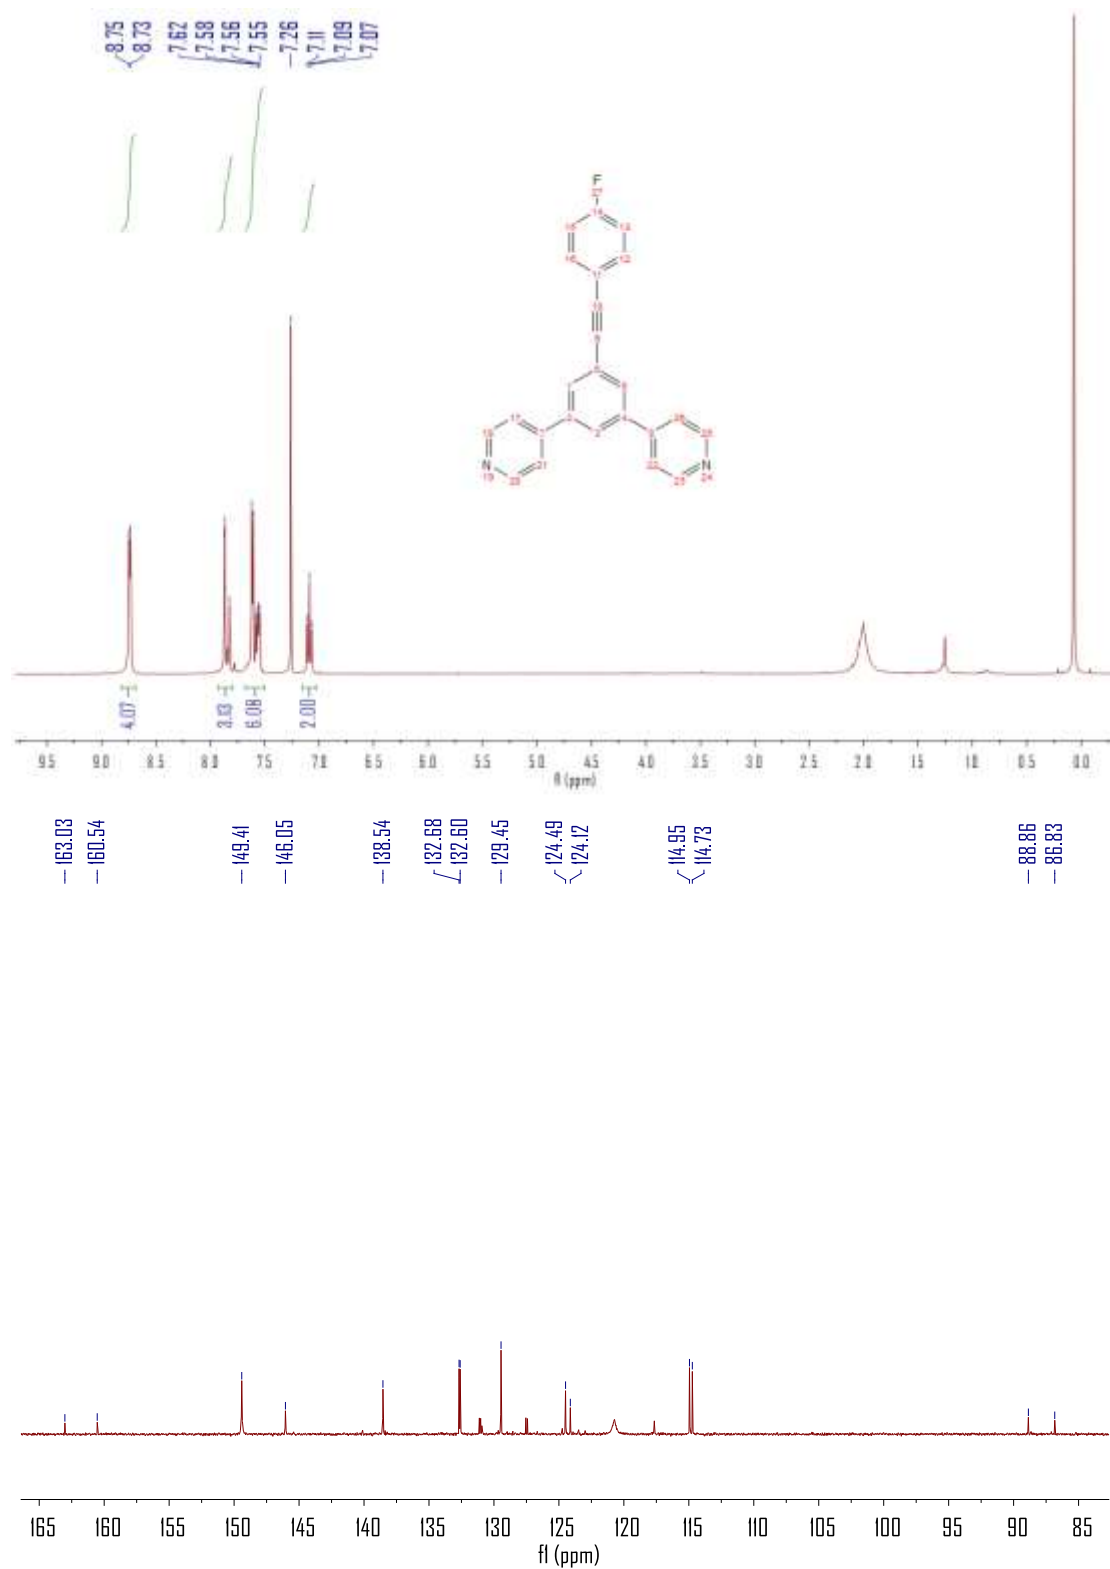

**Figure. S4** The <sup>1</sup>H (a) and <sup>13</sup>C (b) NMR spectra of **Fepbpe** in CDCl<sub>3</sub>.

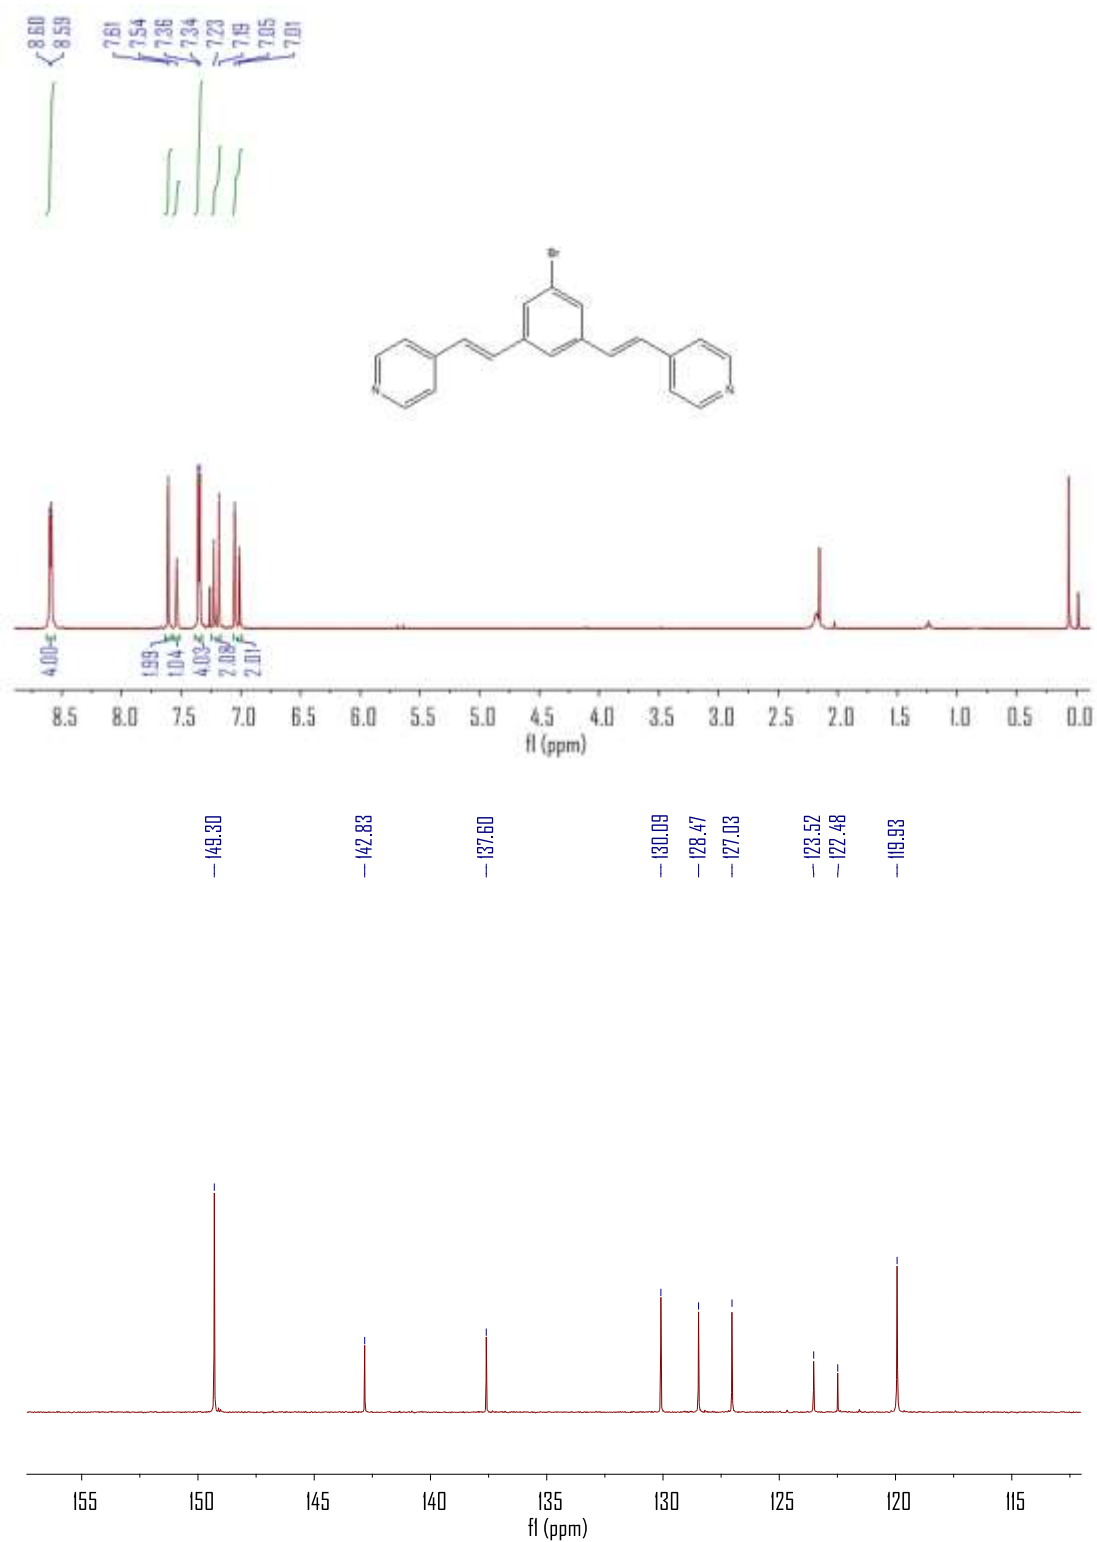

**Figure. S5** The <sup>1</sup>H (a) and <sup>13</sup>C (b) NMR spectra of compound **3** in CDCl<sub>3</sub>.



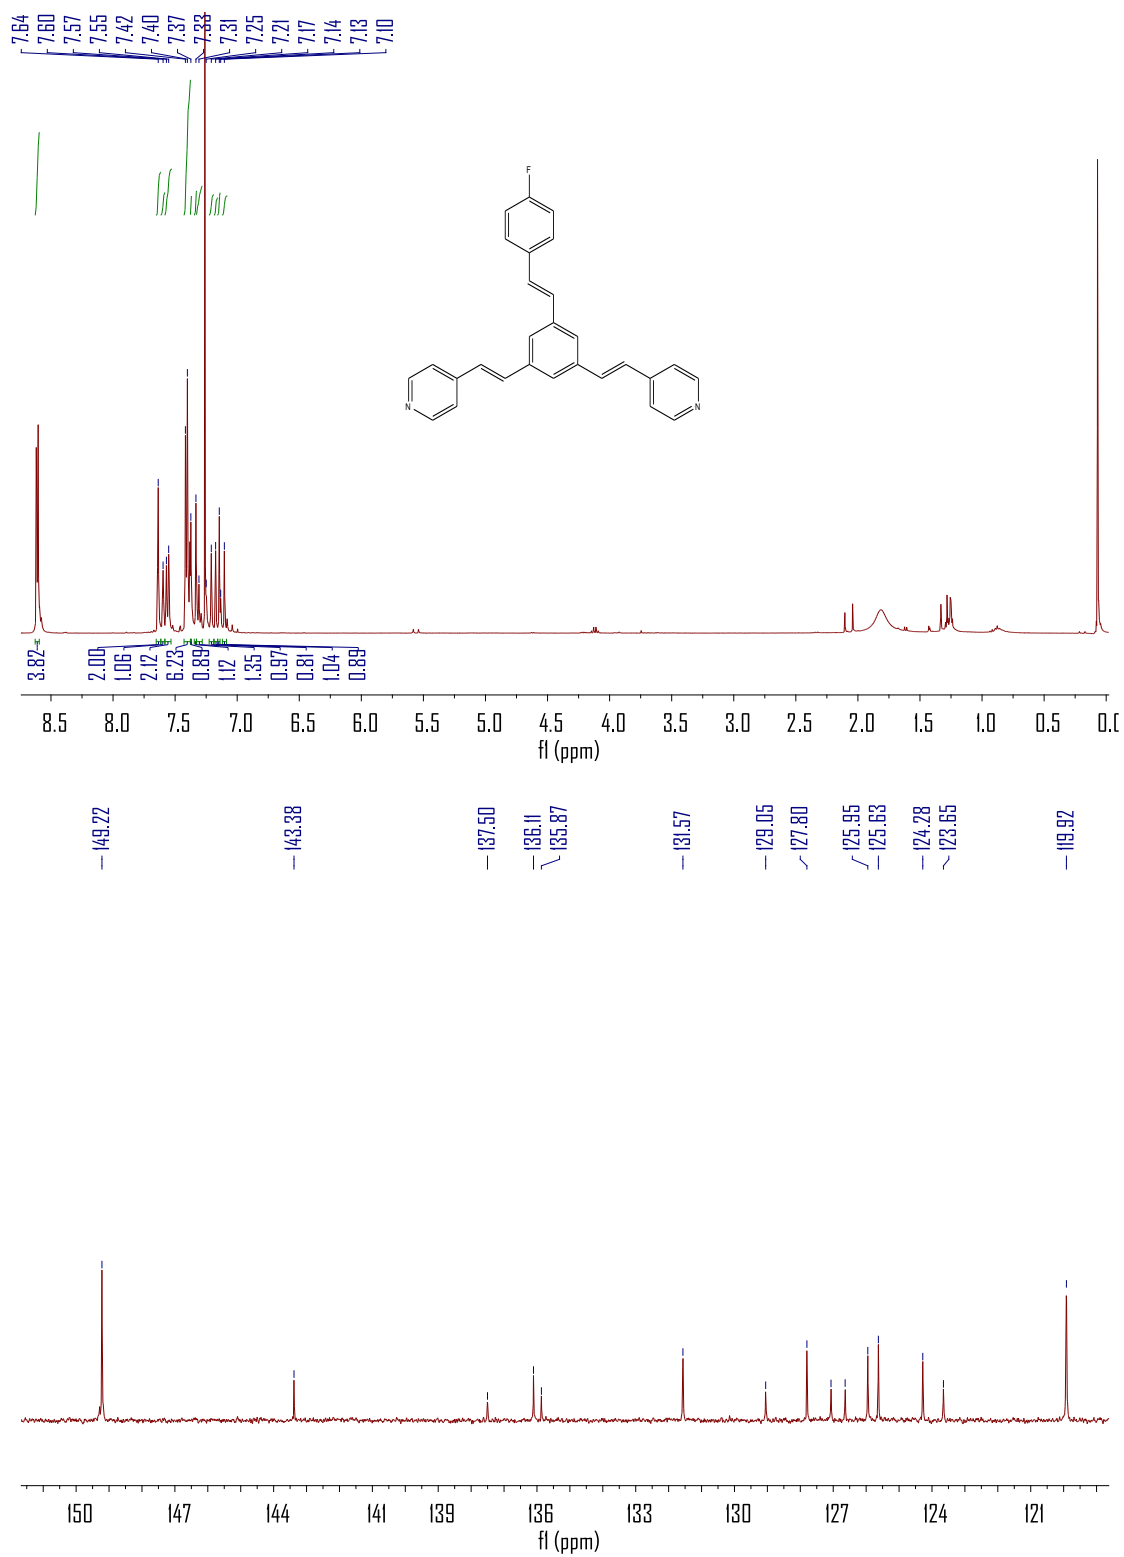

Figure. S6 The <sup>1</sup>H (a) and <sup>13</sup>C (b) NMR spectra of Fsbpeb in CDCl<sub>3</sub>.

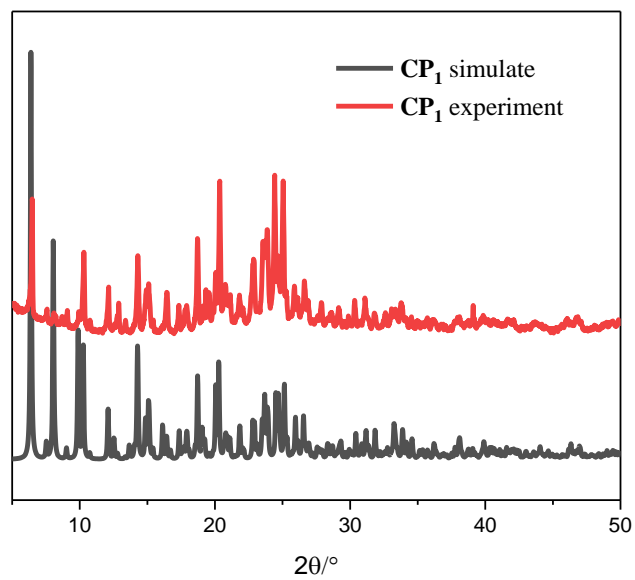

(a)

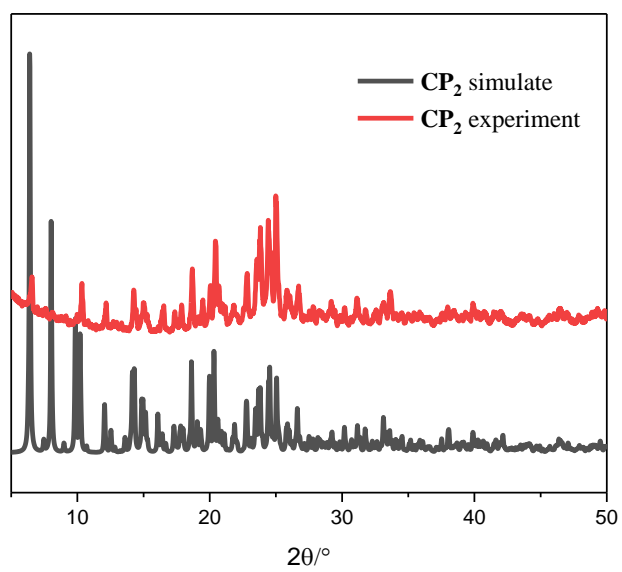

(b)

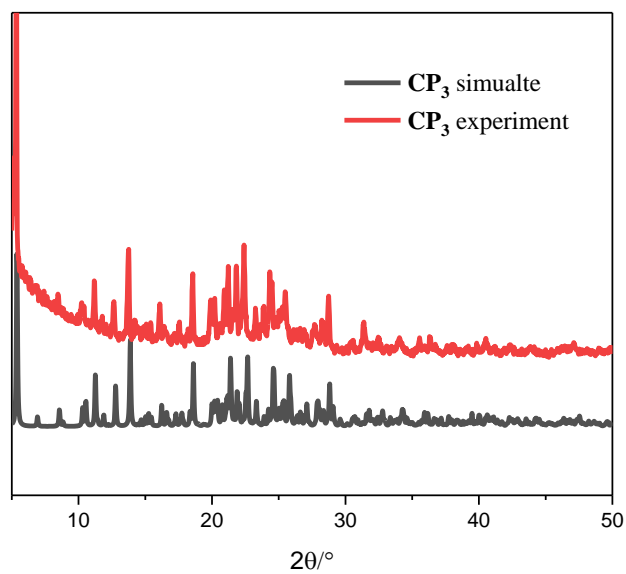

(c)

Figure. S7 PXR D patterns of CP<sub>1</sub> (a), CP<sub>2</sub> (b) and CP<sub>3</sub> (c).

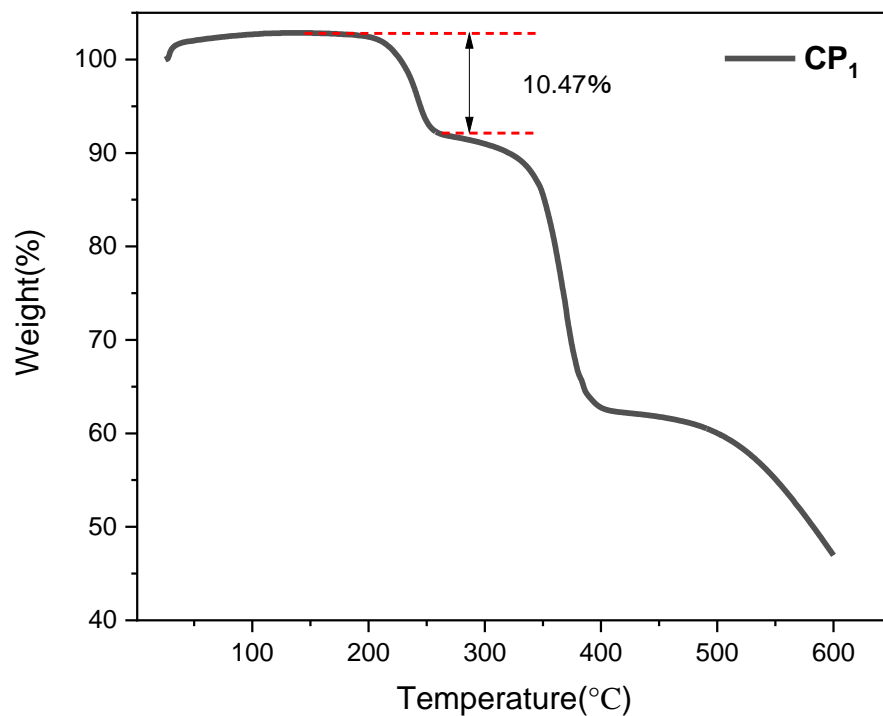

(a)

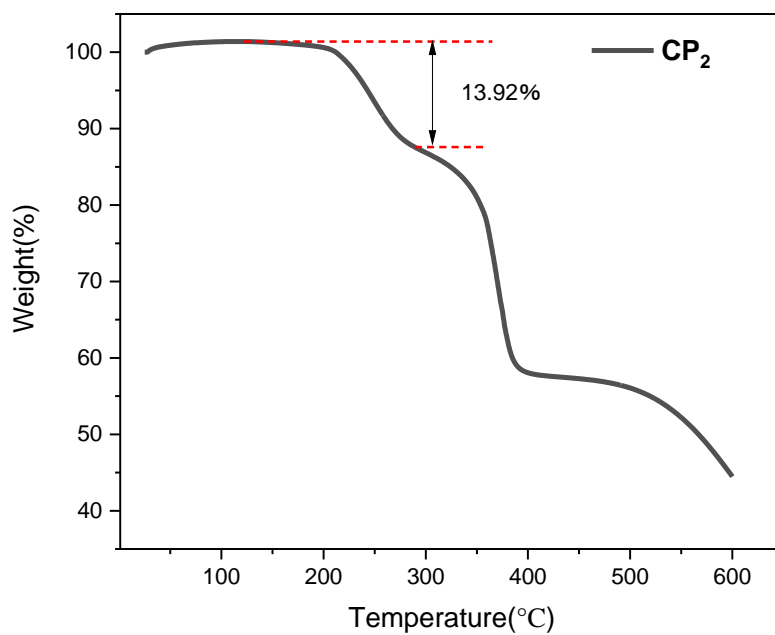

(b)

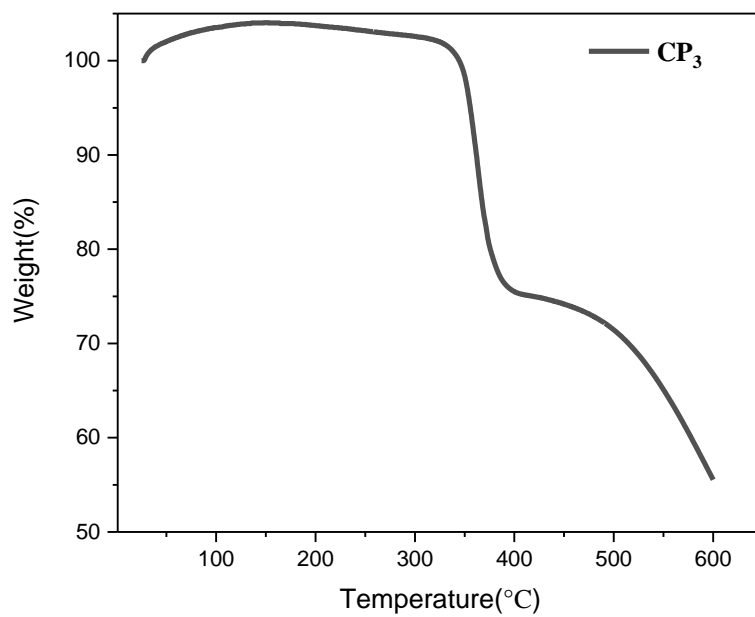

Figure. S8 Thermogravimetric plots of CP<sub>1</sub> (a), CP<sub>2</sub> (b) and CP<sub>3</sub> (c).

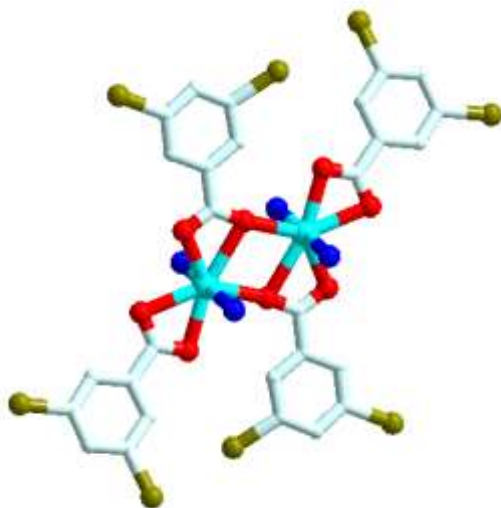

**Figure. S9** View of the coordination environments of Cd (II) centers in CP<sub>1</sub>.

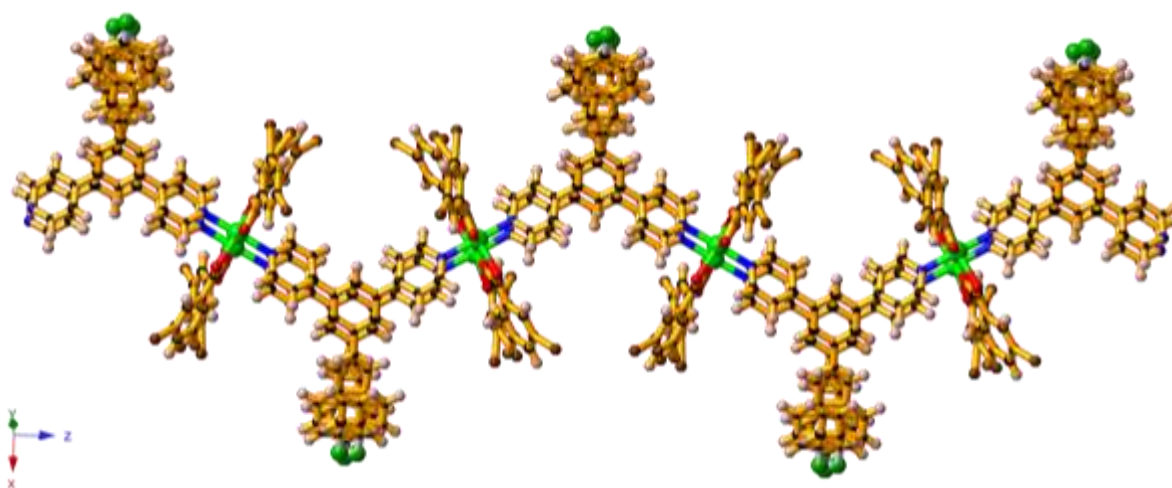

**Figure. S10** 1D chain like motif in CP<sub>1</sub>.

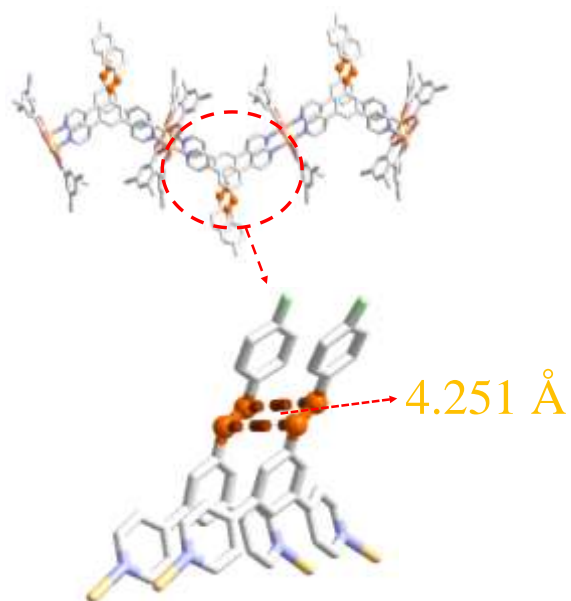

**Figure. S11** The detailed structure of CP<sub>1</sub> showing the C=C distance of 4.251Å.

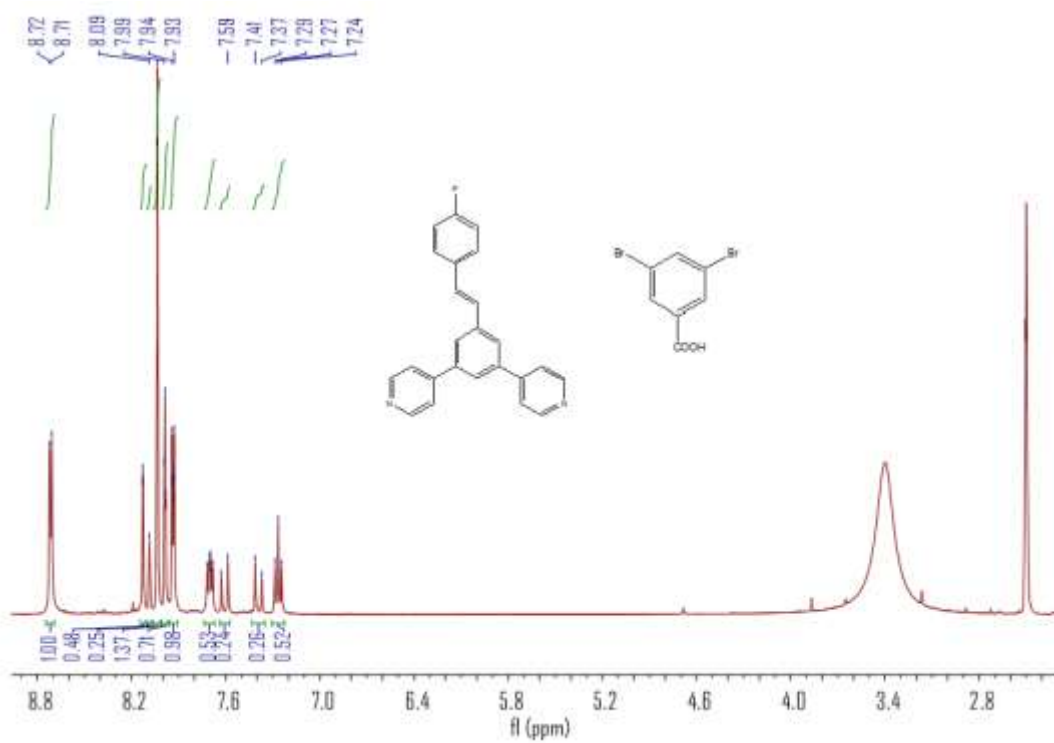

(a)

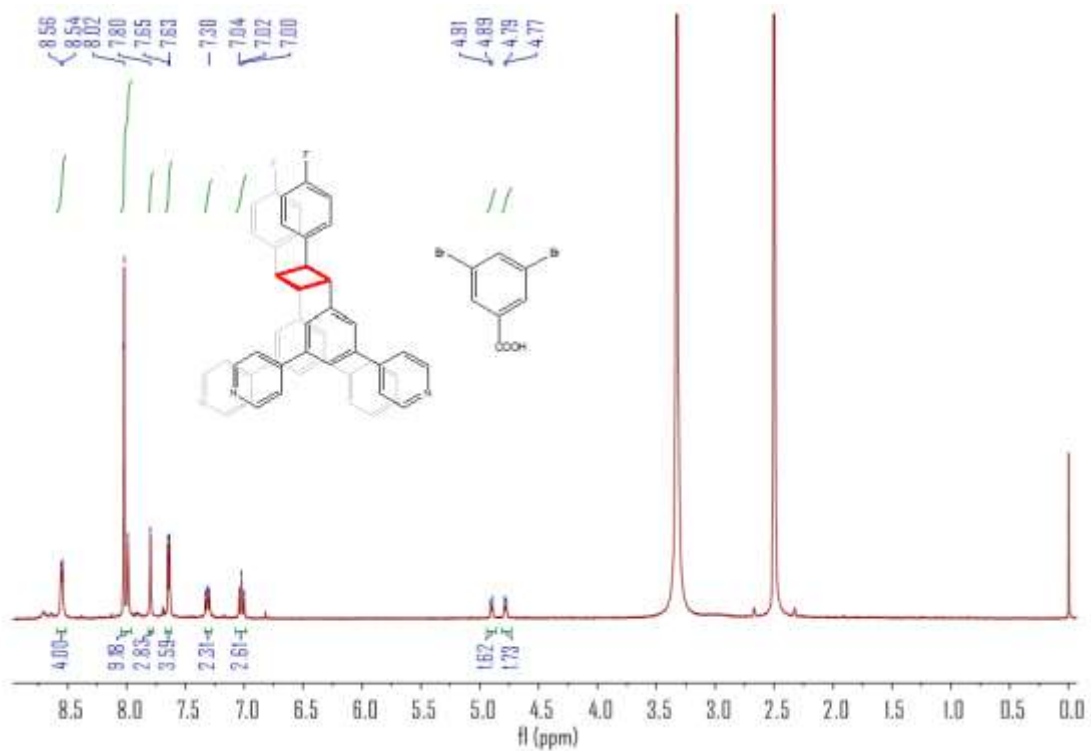

(b)

Figure. S12 The  $^1\text{H}$  NMR spectra of  $\text{CP}_1$  (a) and  $\text{CP}_1'$  (b) in  $\text{DMSO-}d_6$ .

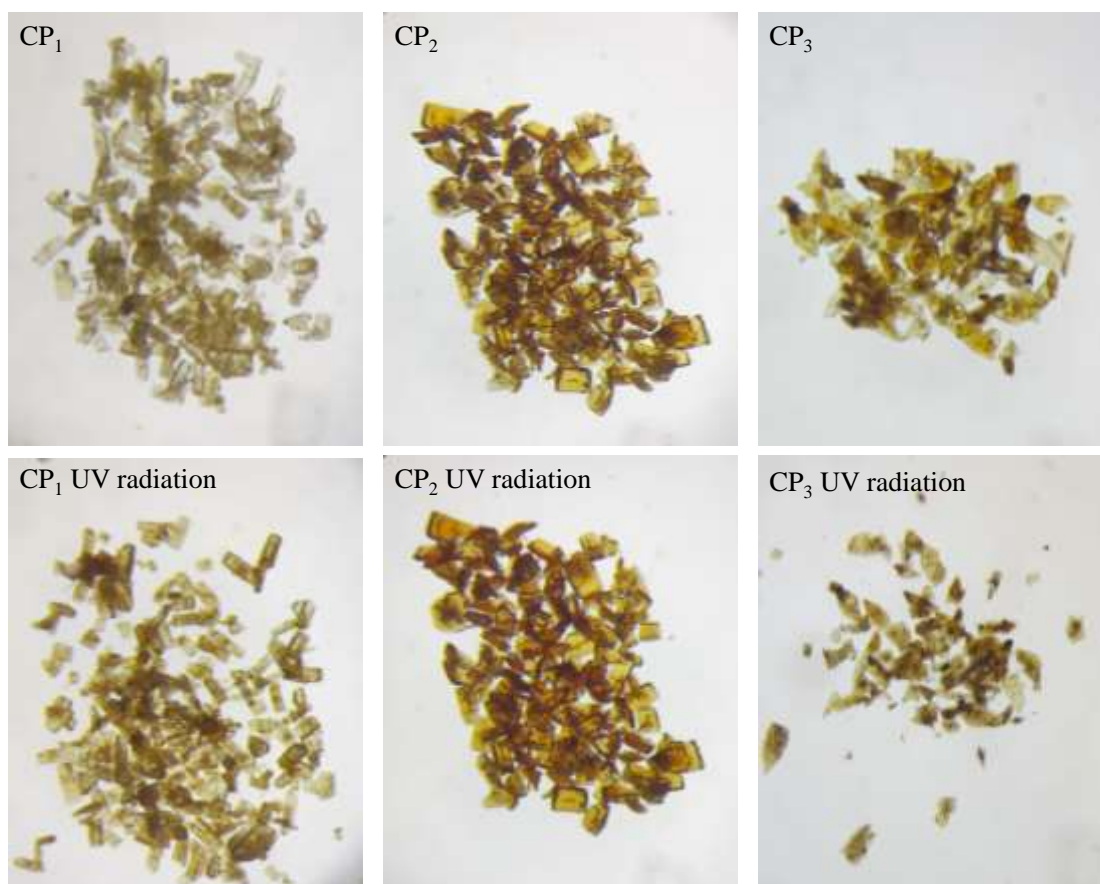

Figure. S13 Photographs of  $\text{CP}_1$ ,  $\text{CP}_2$ ,  $\text{CP}_3$  before and after UV light irradiation.

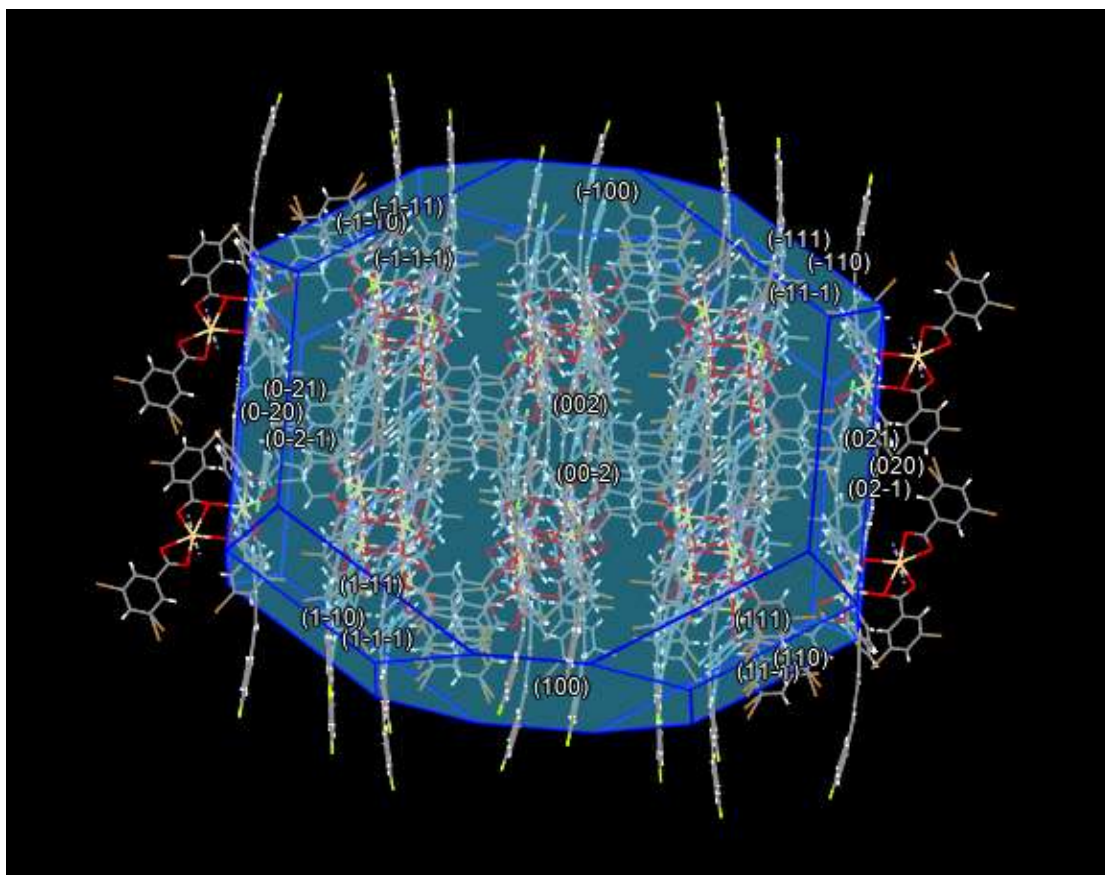

Figure. S14 PS behavior of CP<sub>1</sub>.

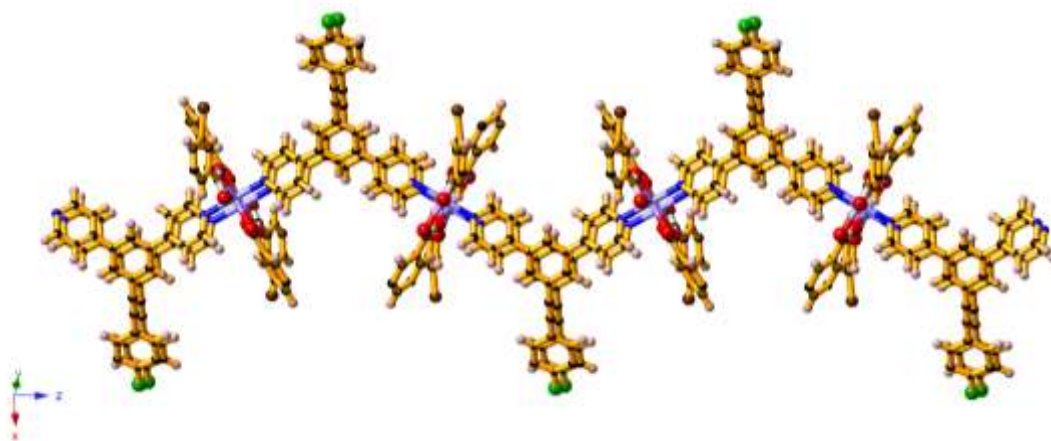

Figure. S15 1D chain motif of CP<sub>2</sub>.



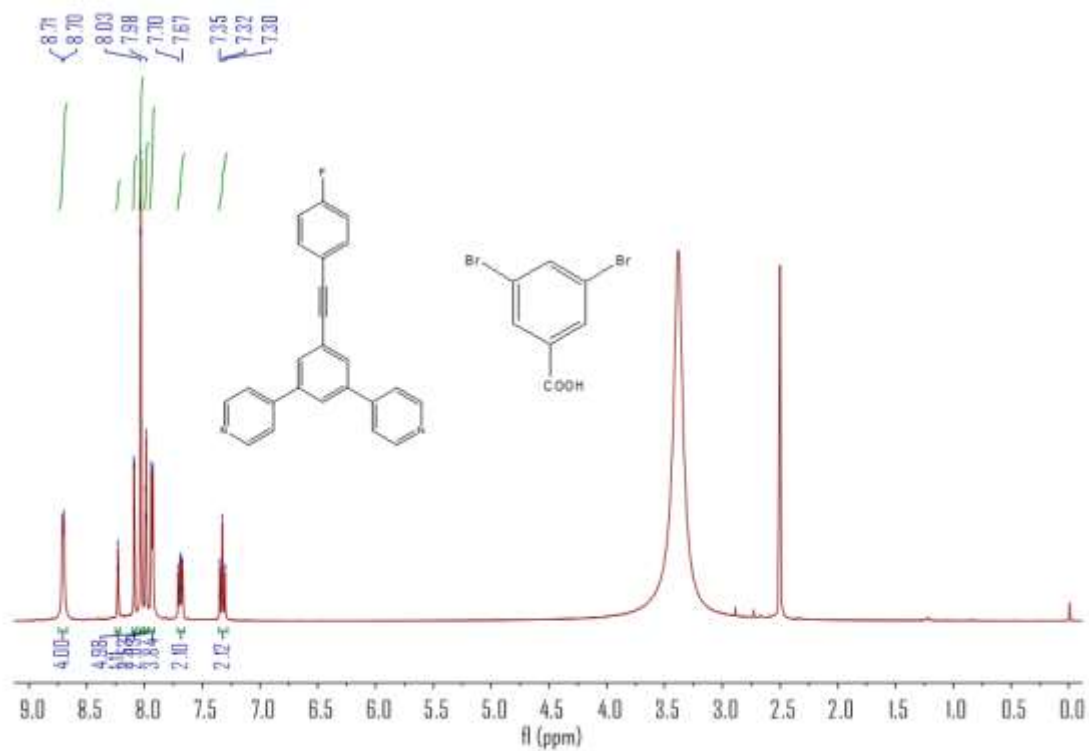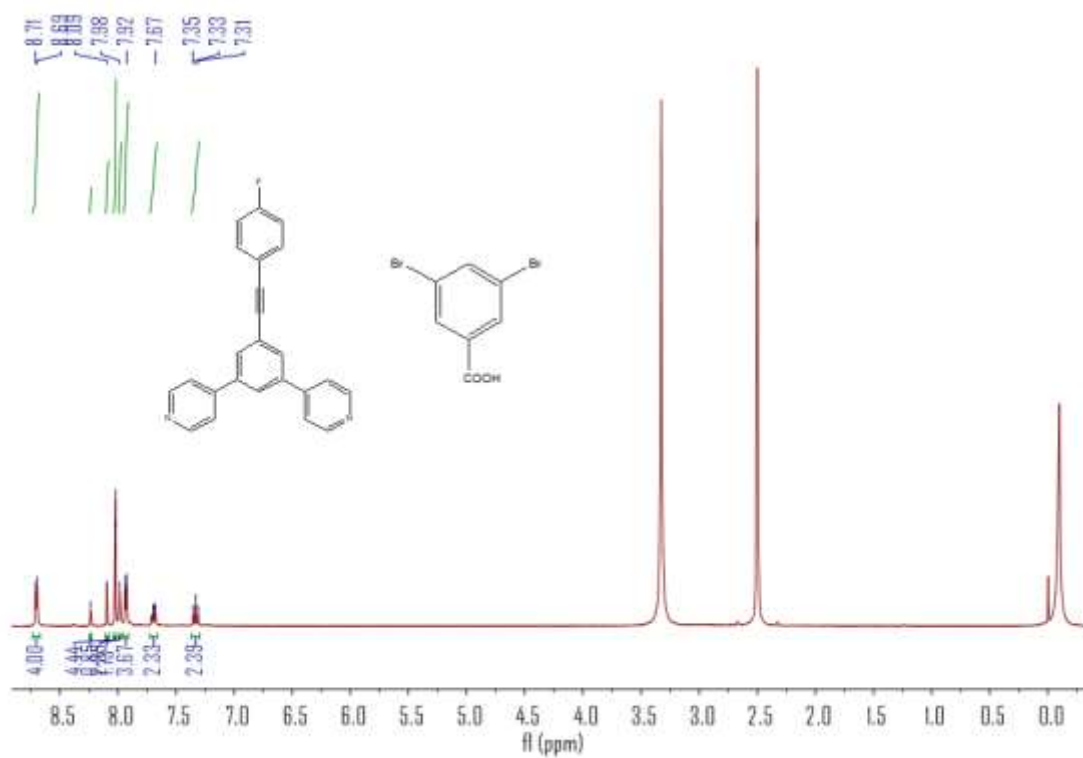

Figure. S16 The  $^1\text{H}$ NMR spectra of CP<sub>2</sub> before and after UV light irradiation.

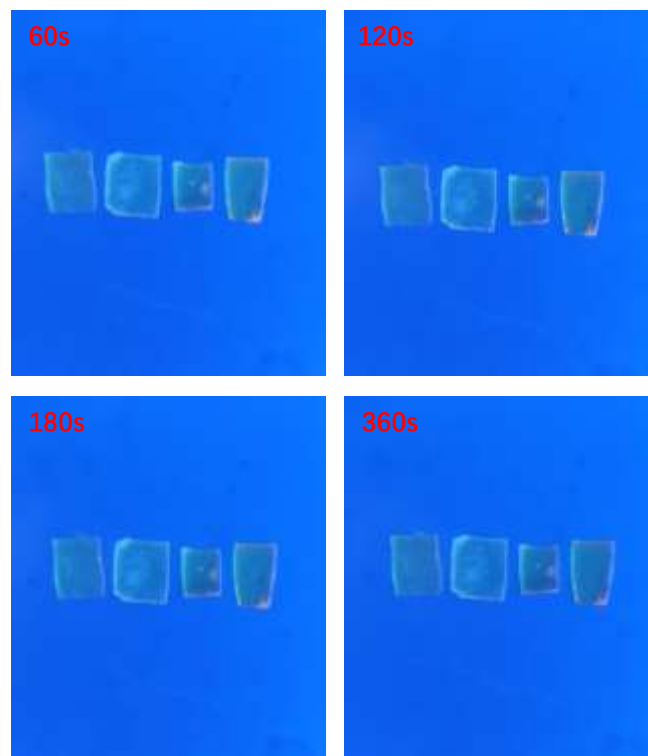

Figure. S17 PS behavior of CP<sub>2</sub>.

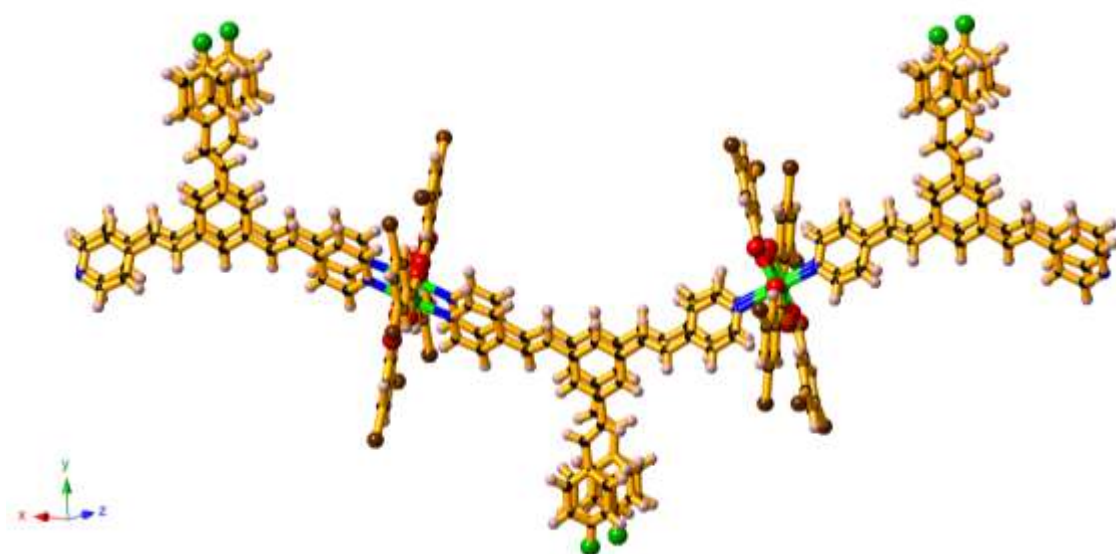

Figure. S18 1D chain like motif of CP<sub>3</sub>.

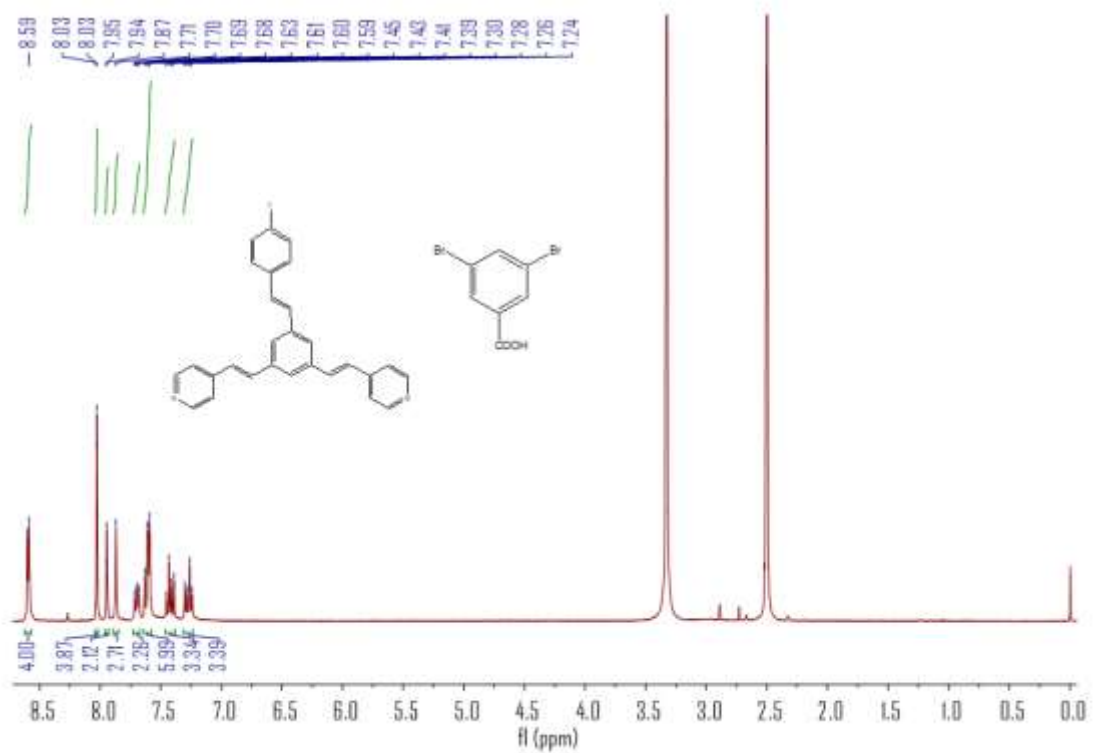

(a)

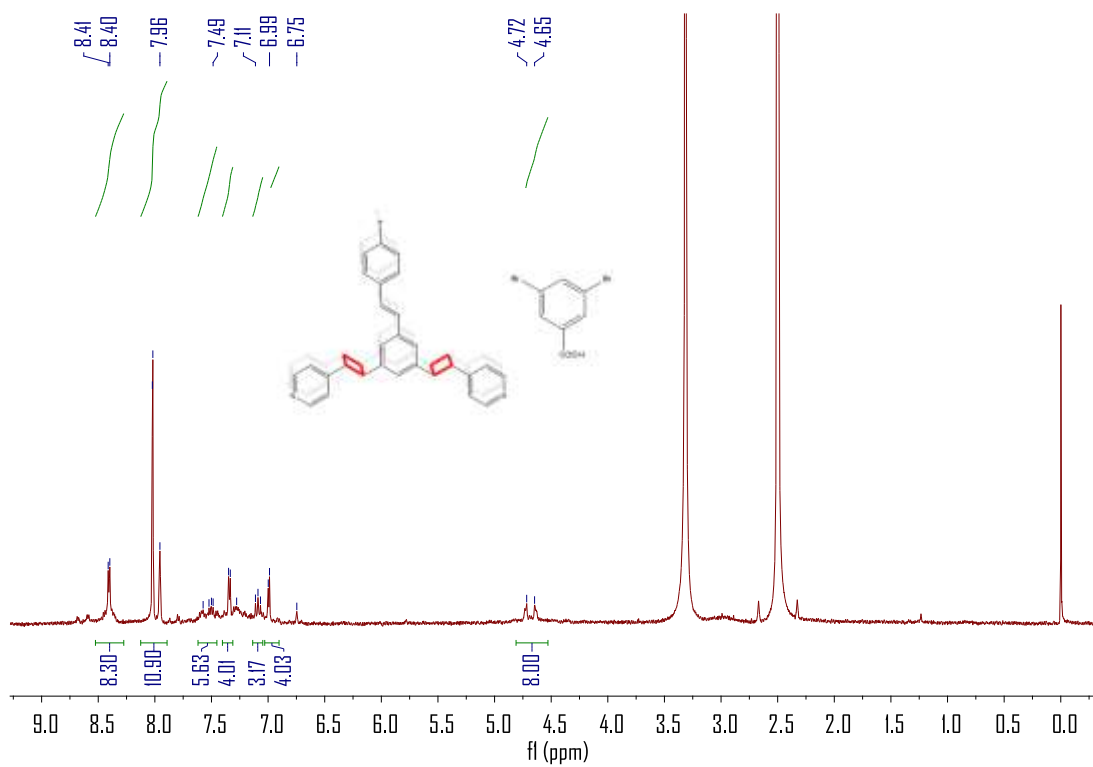

(b)

**Figure. S19** The  $^1\text{H}$  NMR spectra of CP<sub>3</sub> before and after UV light irradiation.

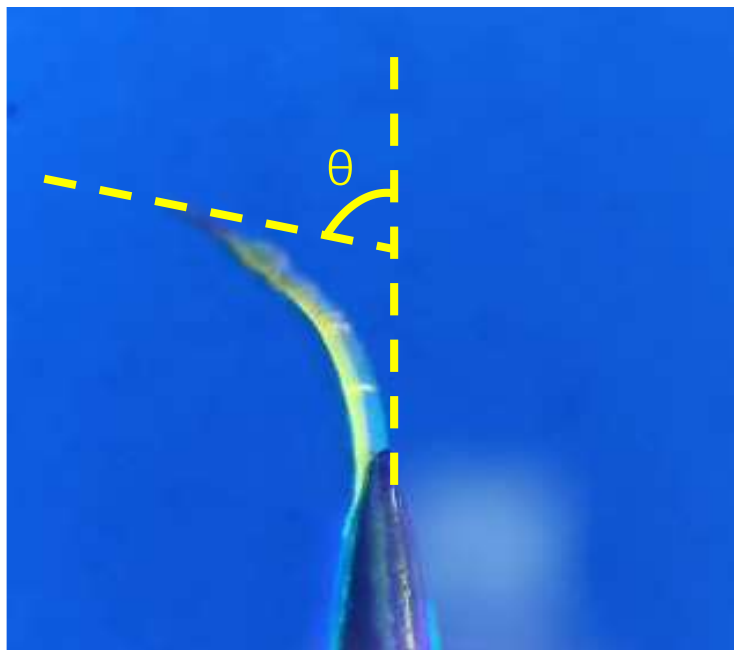

**Figure. S20** The tip displacement angle for CP<sub>3</sub> upon UV light irradiation.

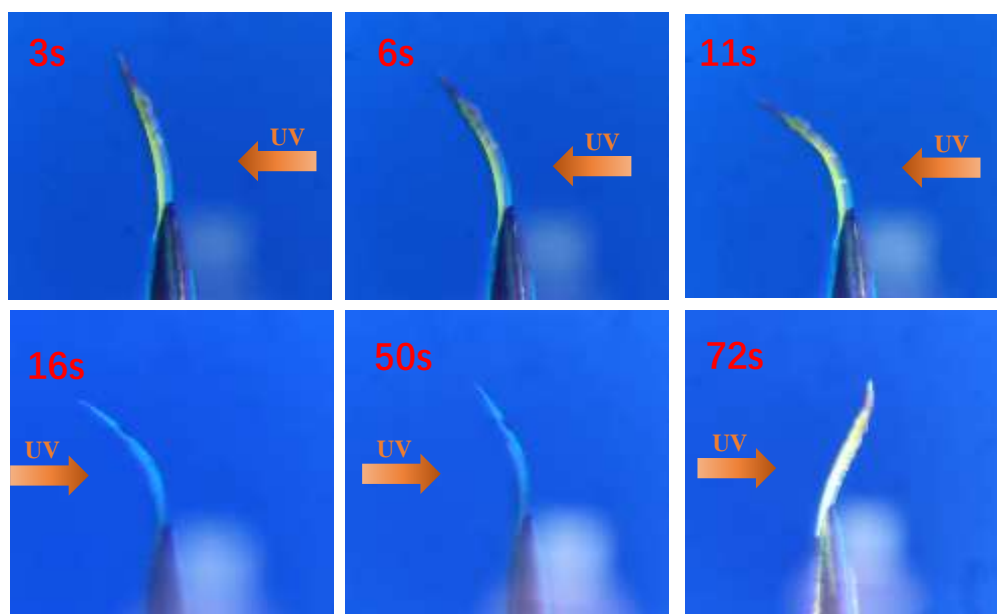

**Figure. S21** CP<sub>3</sub> showed reversible bending behavior against UV light irradiation.

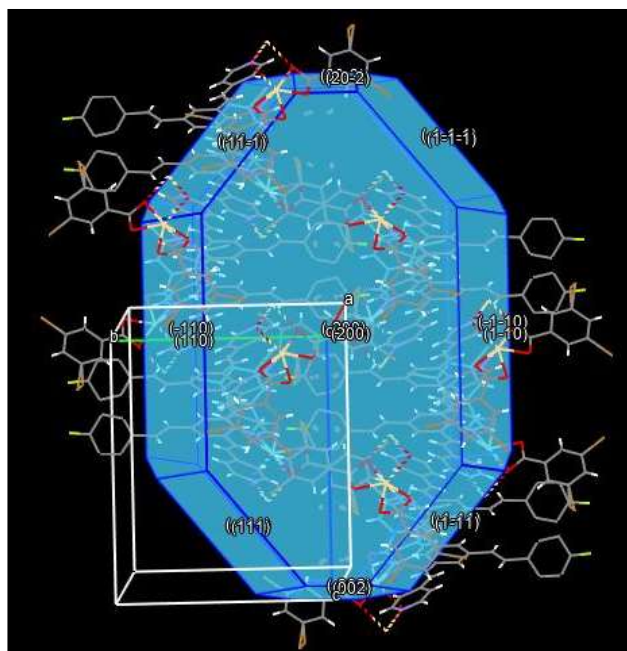

**Figure. S22** Calculated growth morphology of CP<sub>3</sub> from single crystal data (Mercury)<sup>S3</sup>.

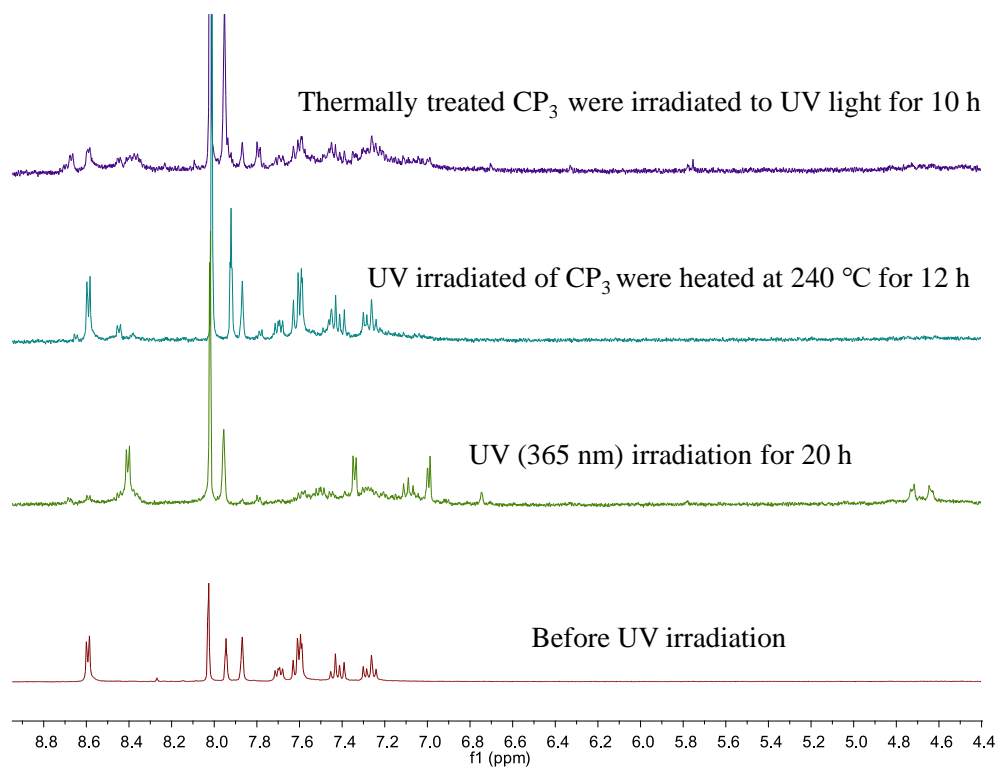

**Figure. S23** The <sup>1</sup>H NMR spectra of CP<sub>3</sub> treated by UV light and heating.

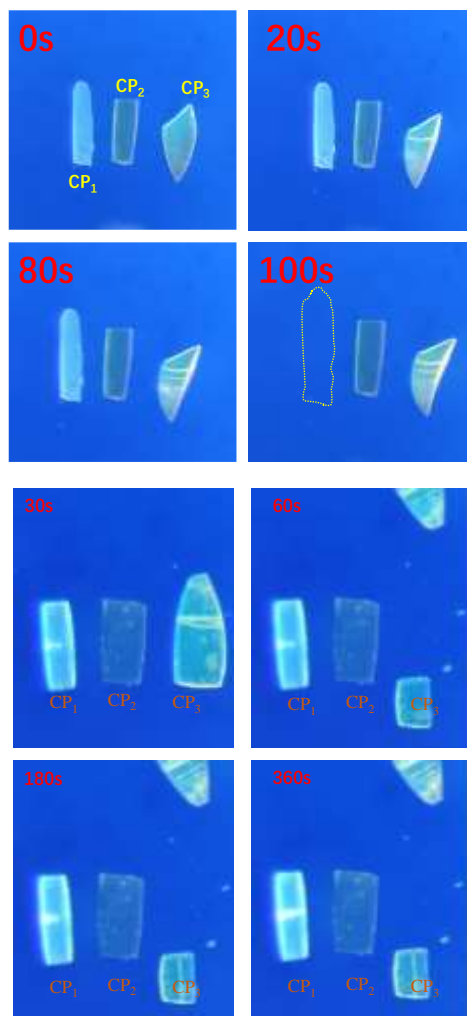

Figure. S24 The PS behaviors of CP<sub>1</sub>-CP<sub>3</sub> under UV light irradiation.

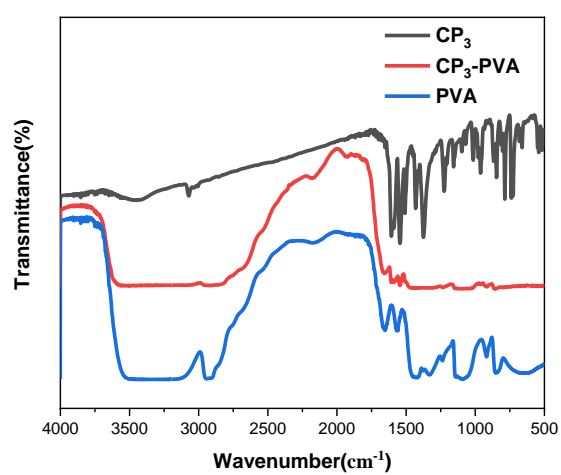

Figure. S25 IR spectra of CP<sub>3</sub>, PVA and CP<sub>3</sub>-PVA membrane.

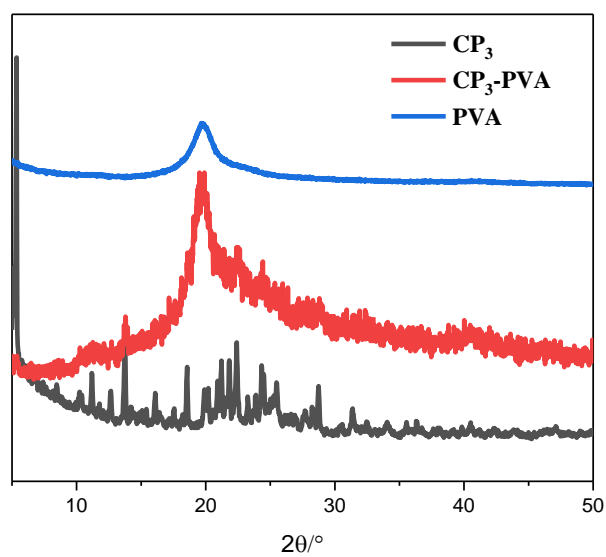

Figure. S26 PXRD profile of CP<sub>3</sub>-PVA membrane.

## References

- S1. J. Sherwood, J. H. Clark, I. J. S. Fairlamb and J. M. Slattery, *Green Chem.*, 2019, **21**, 2164-2213.
- S2. F. Haque, A. Halder and D. Ghoshal, *Cryst. Growth Des.*, 2018, **18**, 5231-5244.
- S3. Y. Shu, K. Ye, Y. Yue, J. Sun, H. Wang, J. Zhong, X. Yang, H. Gao and R. Lu, *CrystEngComm*, 2021, **23**, 5856-5868.
- S4. R. Medishetty, A. Husain, Z. Bai, T. Runcevski, R. E. Dinnebier, P. Naumov and J. J. Vittal, *Angew. Chem. Int. Ed.*, 2014, **53**, 5907-5911.
